# Supplementary material for: Androgen receptor-modulatory microRNAs provide insight into therapy resistance and therapeutic targets in advanced prostate cancer
Source: PubMed Central journal article supplement (PMC6755970; doi:10.1038/s41388-019-0823-5), 2019-05-01
Supplement: 41388_2019_823_MOESM1_ESM.pdf [file 41388_2019_823_MOESM1_ESM.pdf]

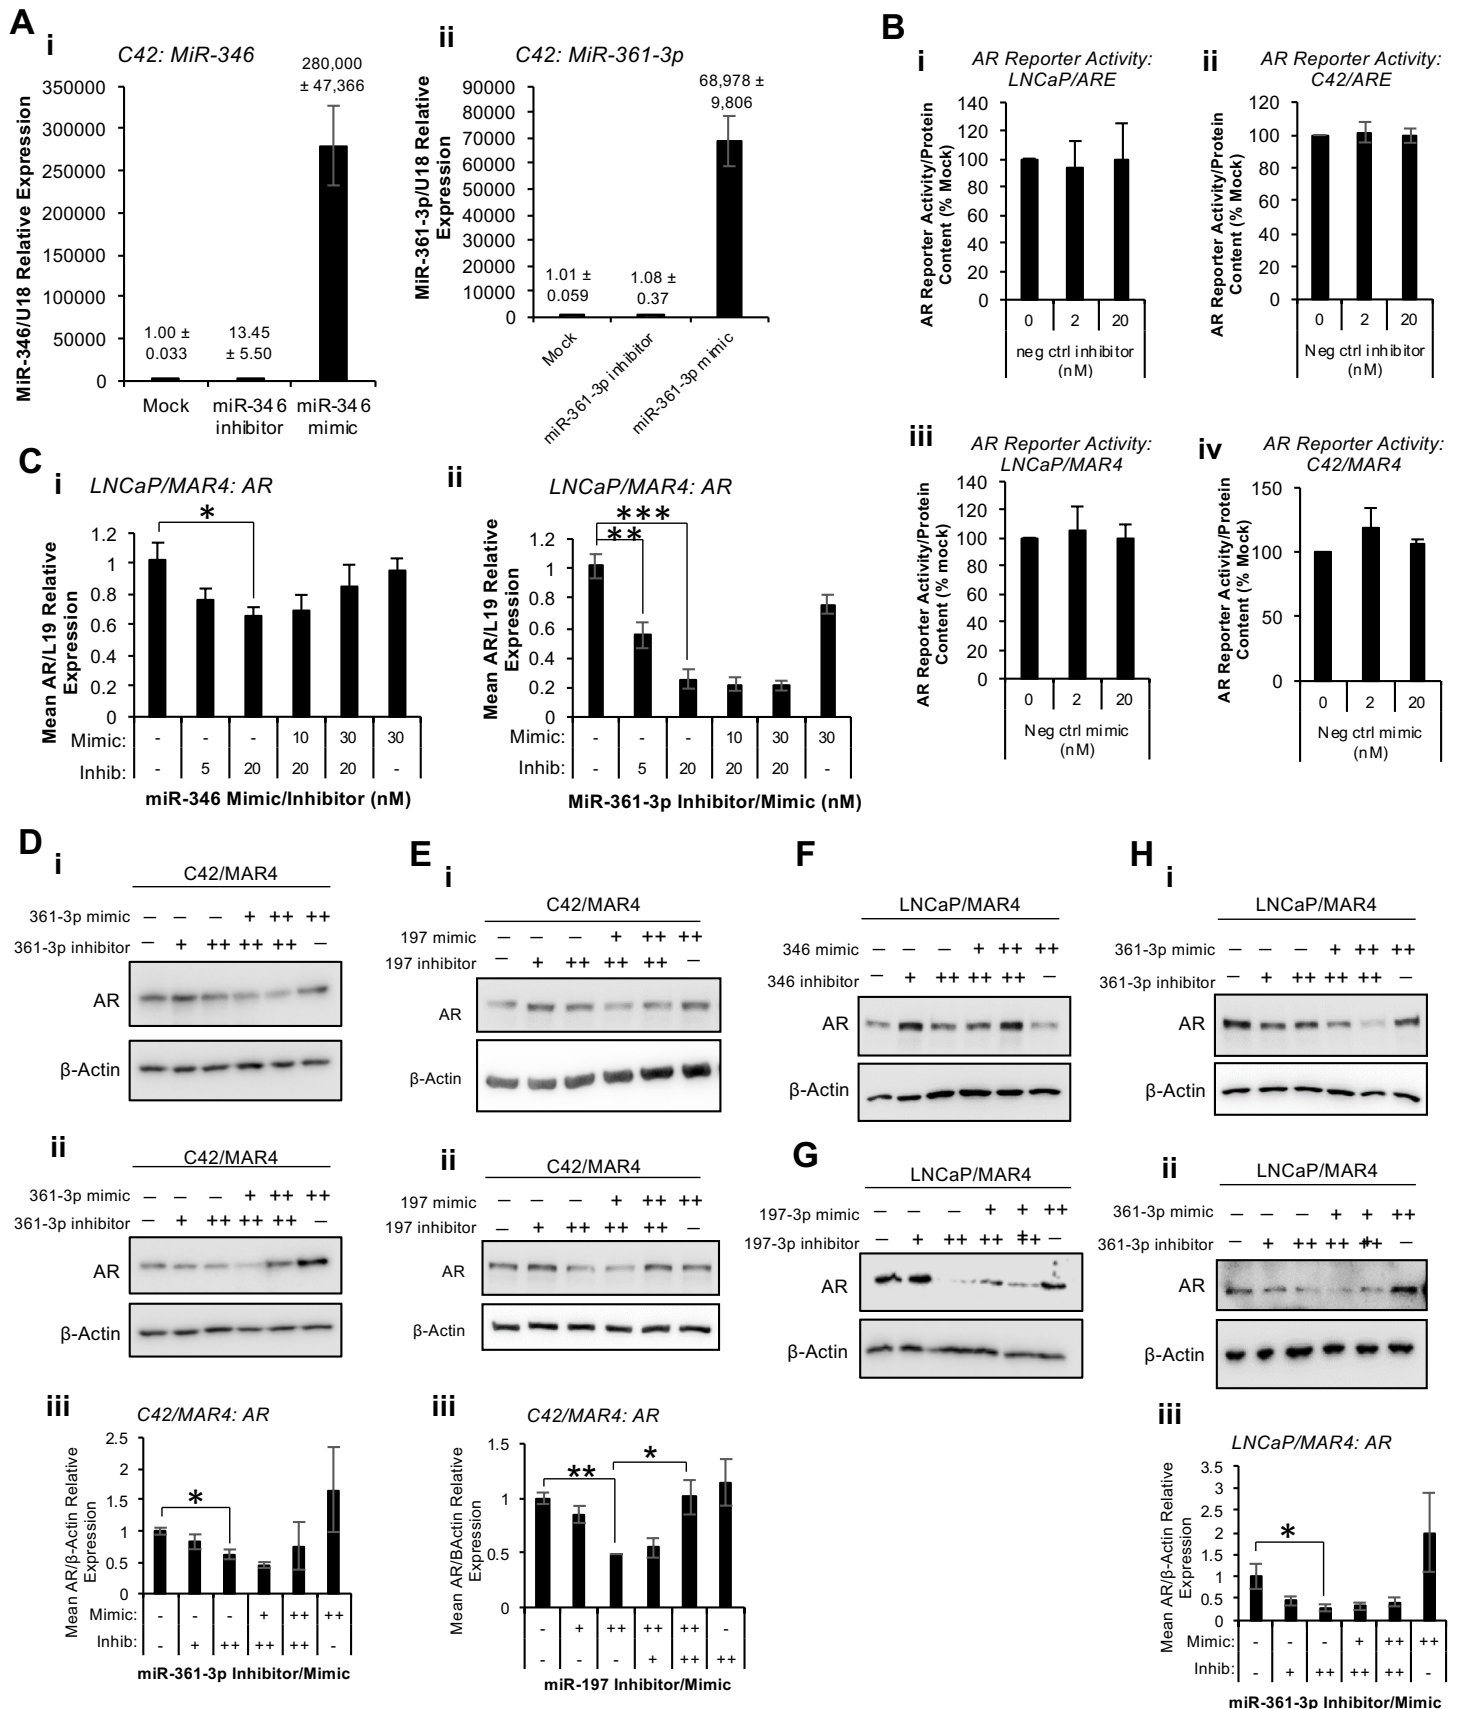

**Figure S1: Validation of Effects of MiR-346, -361-3p and -197 on AR mRNA and Protein Levels.** A) qRT-PCR analysis of (i) miR-346 or (ii) miR-361-3p levels in C42 cells transfected with (i) miR-346 or (ii) miR-361-3p inhibitor or mimic for 24h. U18 was used for normalization. C) qRT-PCR analysis of AR mRNA levels in LNCaP/MAR4 cells transfected with (i) miR-346 or (ii) miR-361-3p mimic and/or inhibitor for 24h. L19 was used as a normalisation gene. (A-C) Columns: mean  $\pm$  SEM for three independent experiments performed in triplicate (A,C) or duplicate (B). D-H) Western blot analysis of AR protein levels in C42/MAR4 (D,E) or LNCaP/MAR4 cells (F-H) transfected with (D,H) miR-361-3p, (E,G) miR-197 or (F) miR-346 mimic and/or inhibitor for 24h.  $\beta$ -actin was used as a control for loading. Densitometry was performed using Image J software and relative protein levels are displayed (iii). Independent biological replicates relating to Fig 2B are shown. Columns: mean relative protein levels  $\pm$  SEM for three independent experiments. \*  $P \leq 0.05$ , \*\*  $P \leq 0.005$ , \*\*\*  $P \leq 0.0001$ . See also Fig 1, 2.

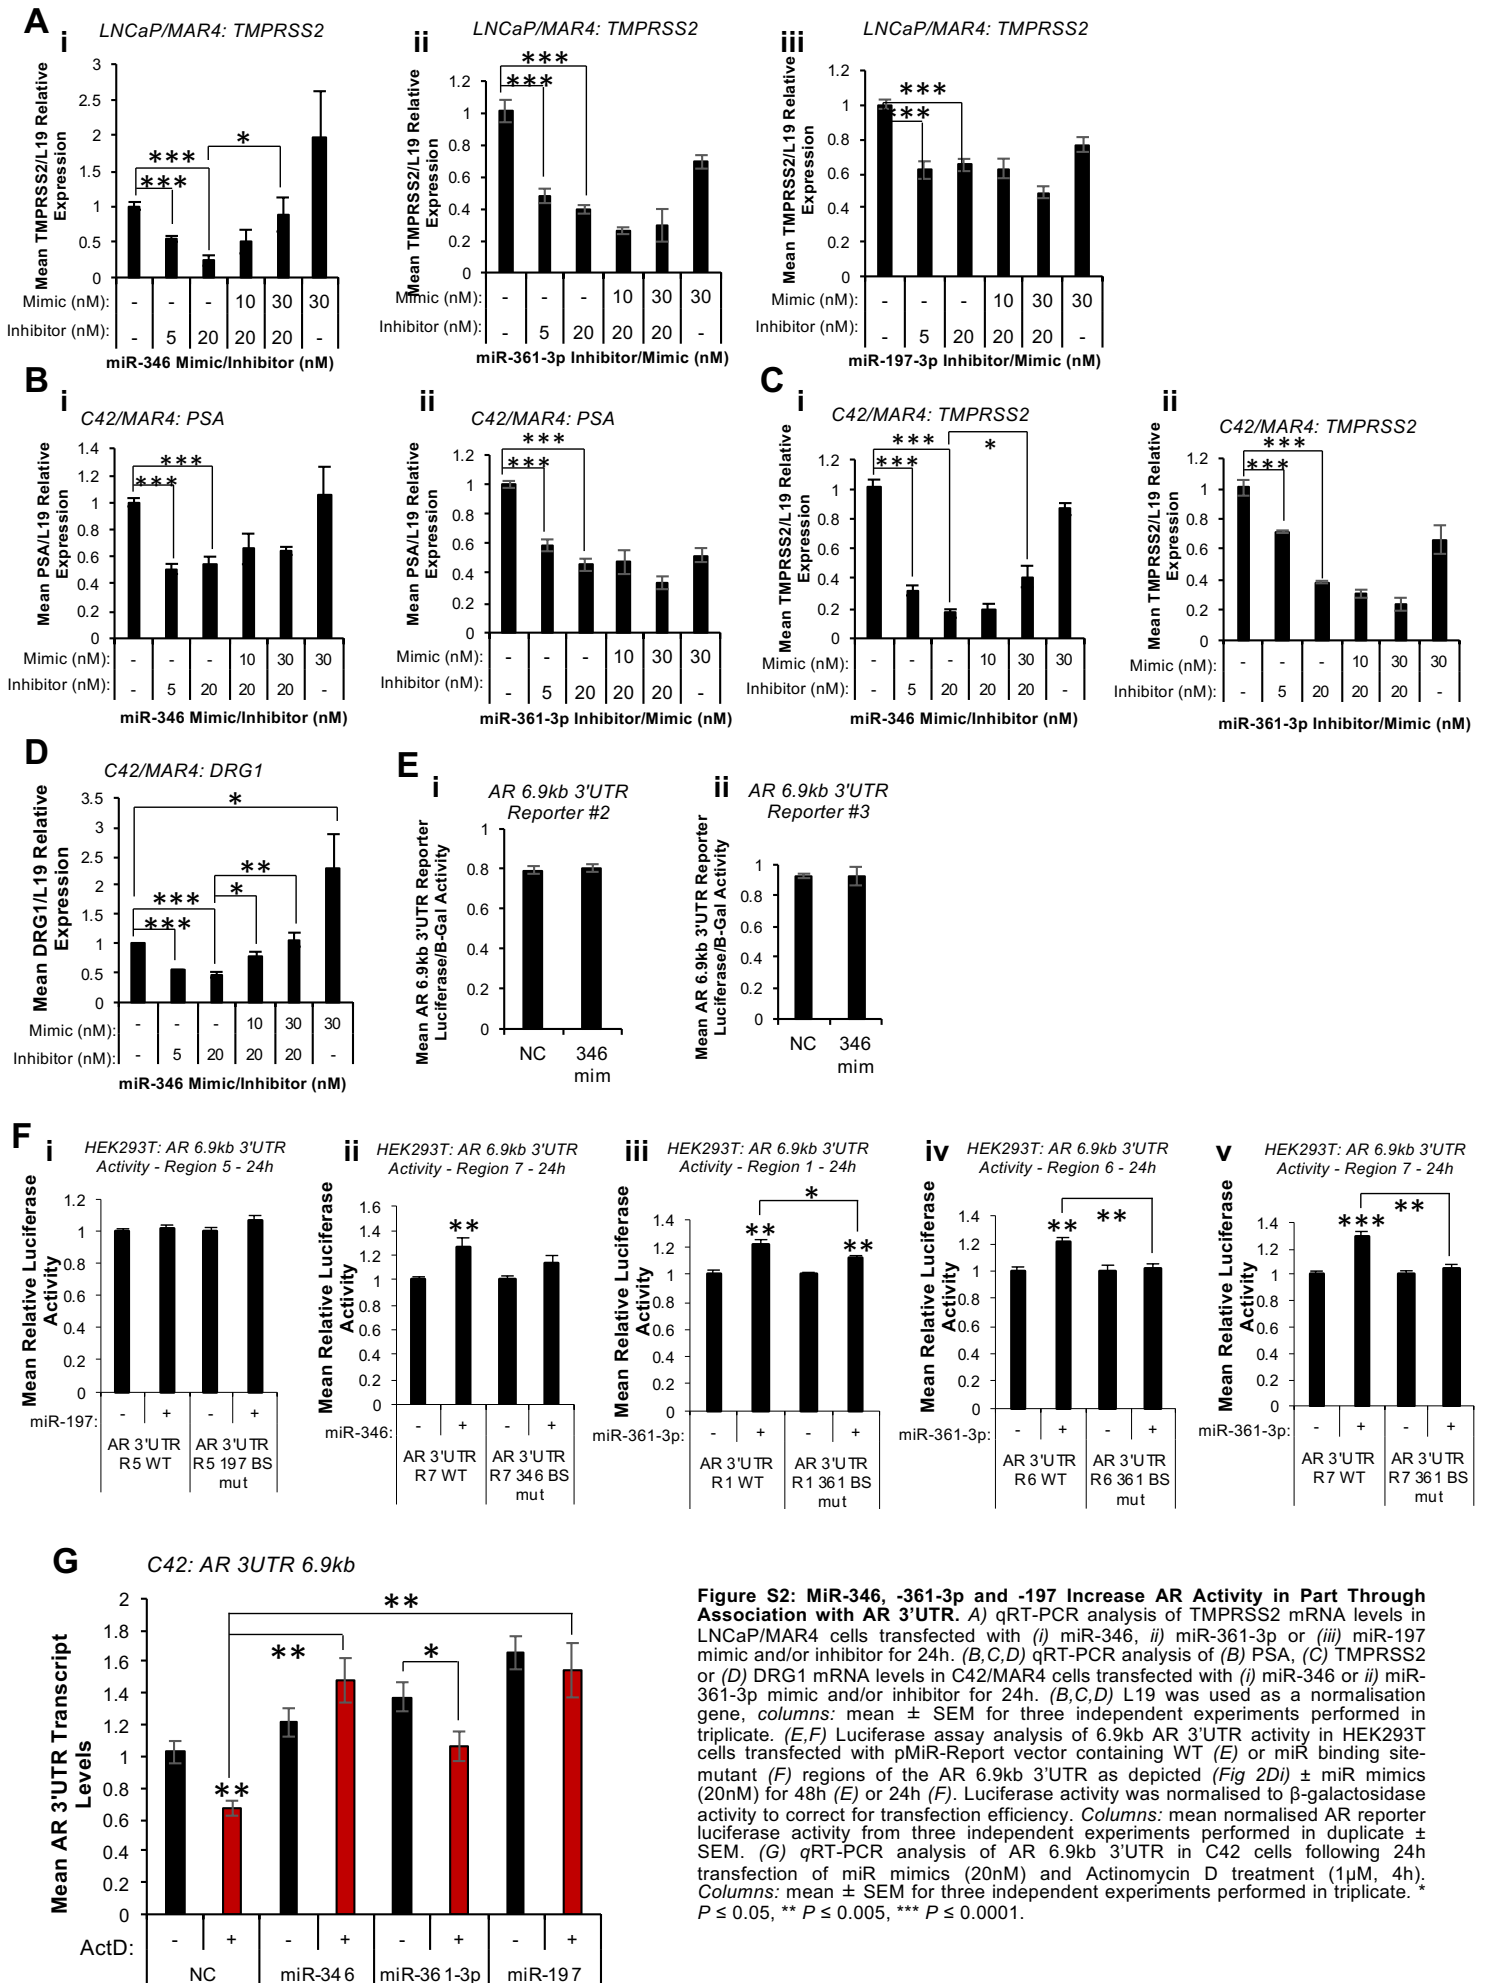

**Figure S2: MiR-346, -361-3p and -197 Increase AR Activity in Part Through Association with AR 3'UTR.** A) qRT-PCR analysis of *TPRSS2* mRNA levels in LNCaP/MAR4 cells transfected with (i) miR-346, (ii) miR-361-3p or (iii) miR-197 mimic and/or inhibitor for 24h. (B,C,D) qRT-PCR analysis of (B) PSA, (C) *TPRSS2* or (D) *DRG1* mRNA levels in C42/MAR4 cells transfected with (i) miR-346 or (ii) miR-361-3p mimic and/or inhibitor for 24h. (B,C,D) L19 was used as a normalisation gene, columns: mean  $\pm$  SEM for three independent experiments performed in triplicate. (E,F) Luciferase assay analysis of 6.9kb AR 3'UTR activity in HEK293T cells transfected with pMiR-Reporter vector containing WT (E) or miR binding site mutant (F) regions of the AR 6.9kb 3'UTR as depicted (Fig 2Di)  $\pm$  miR mimics (20nM) for 48h (E) or 24h (F). Luciferase activity was normalised to  $\beta$ -galactosidase activity to correct for transfection efficiency. Columns: mean normalised AR reporter luciferase activity from three independent experiments performed in duplicate  $\pm$  SEM. (G) qRT-PCR analysis of AR 6.9kb 3'UTR in C42 cells following 24h transfection of miR mimics (20nM) and Actinomycin D treatment (1 $\mu$ M, 4h), Columns: mean  $\pm$  SEM for three independent experiments performed in triplicate. \*  $P \leq 0.05$ , \*\*  $P \leq 0.005$ , \*\*\*  $P \leq 0.0001$ .



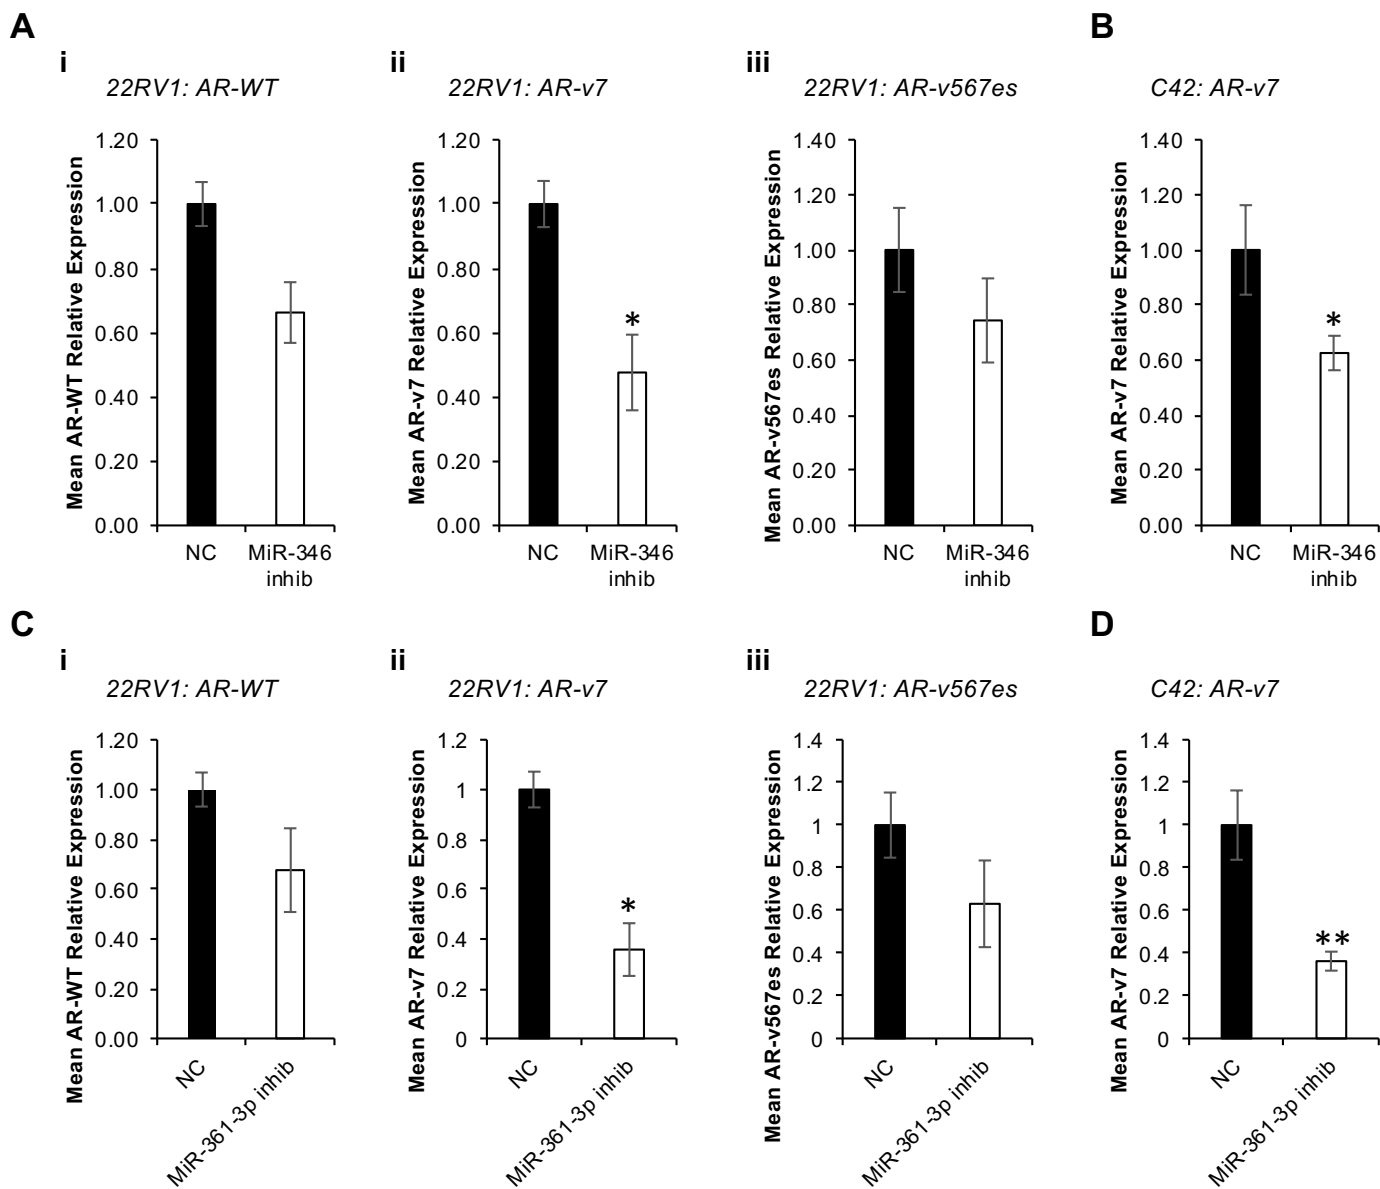

**Figure S4: MiR-346 and MiR-361-3p Alter Levels of AR Variants in Prostate Cancer Cells.** A-D) qRT-PCR analysis of wild-type AR (i), AR-v7 (ii,iv) and AR-v567es (iii) mRNA levels in 22RV1 (A,C) and C42 (B,D) cells transfected with (A,B) miR-346 or (C,D) miR-361-3p inhibitor (both 5nM) for 24h. Mean of L19 and GAPDH was used for normalisation. Columns: mean  $\pm$  SEM for three independent experiments performed in triplicate. \*  $P \leq 0.05$ , \*\*  $P \leq 0.005$ . See also Fig 2.

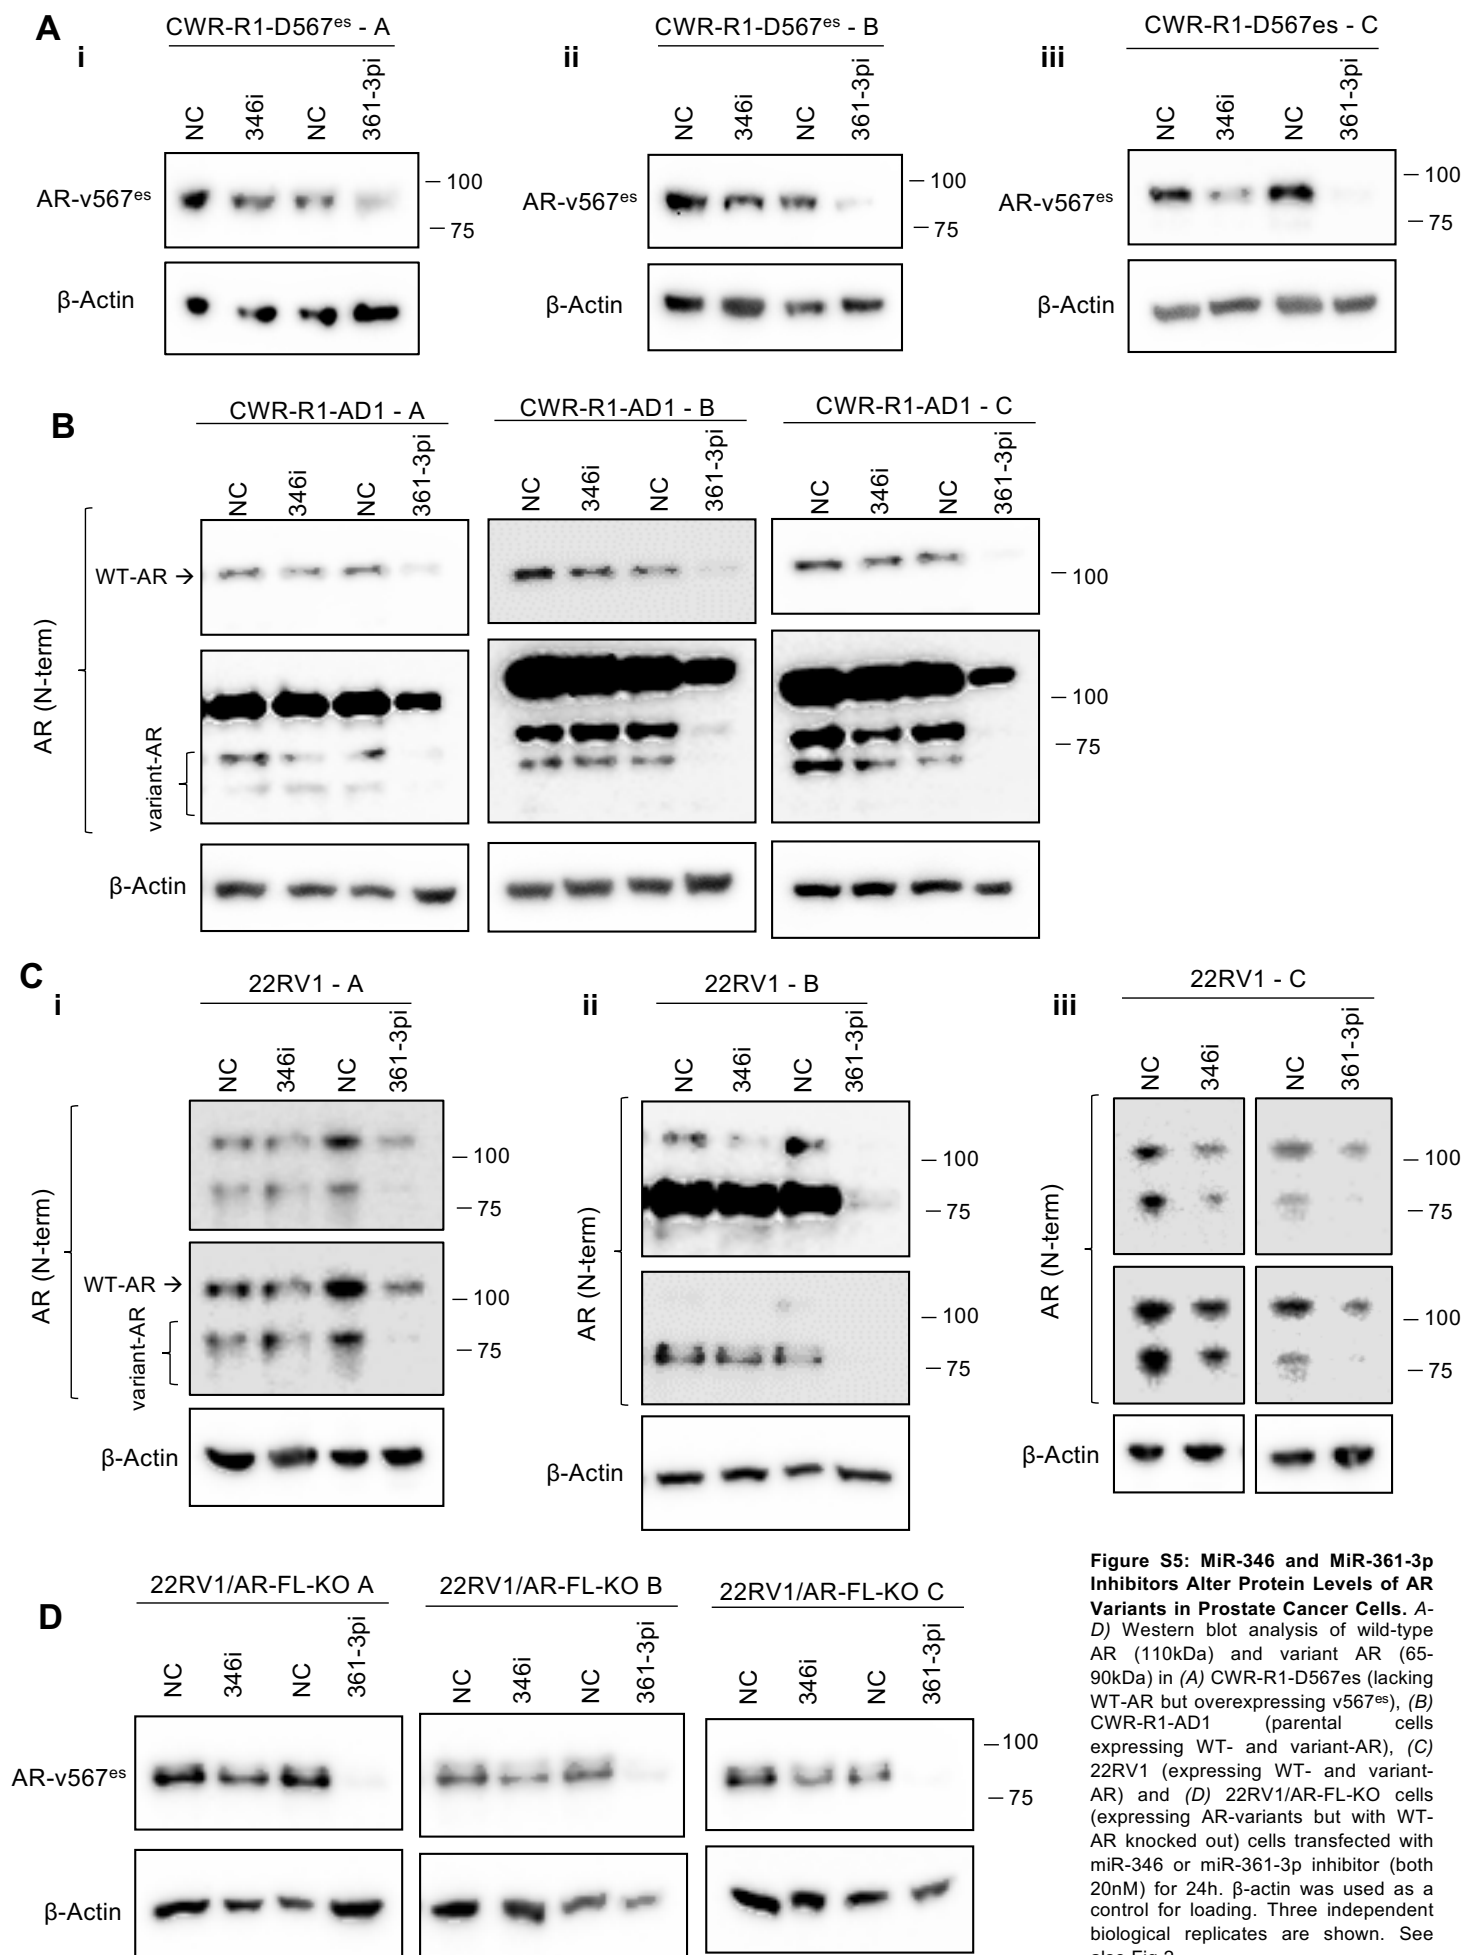

**Figure S5: MiR-346 and MiR-361-3p Inhibitors Alter Protein Levels of AR Variants in Prostate Cancer Cells.** A-D) Western blot analysis of wild-type AR (110kDa) and variant AR (65-90kDa) in (A) CWR-R1-D567<sup>es</sup> (lacking WT-AR but overexpressing v567<sup>es</sup>), (B) CWR-R1-AD1 (parental cells expressing WT- and variant-AR), (C) 22RV1 (expressing WT- and variant-AR) and (D) 22RV1/AR-FL-KO cells (expressing AR-variants but with WT-AR knocked out) cells transfected with miR-346 or miR-361-3p inhibitor (both 20nM) for 24h.  $\beta$ -actin was used as a control for loading. Three independent biological replicates are shown. See also Fig 2.

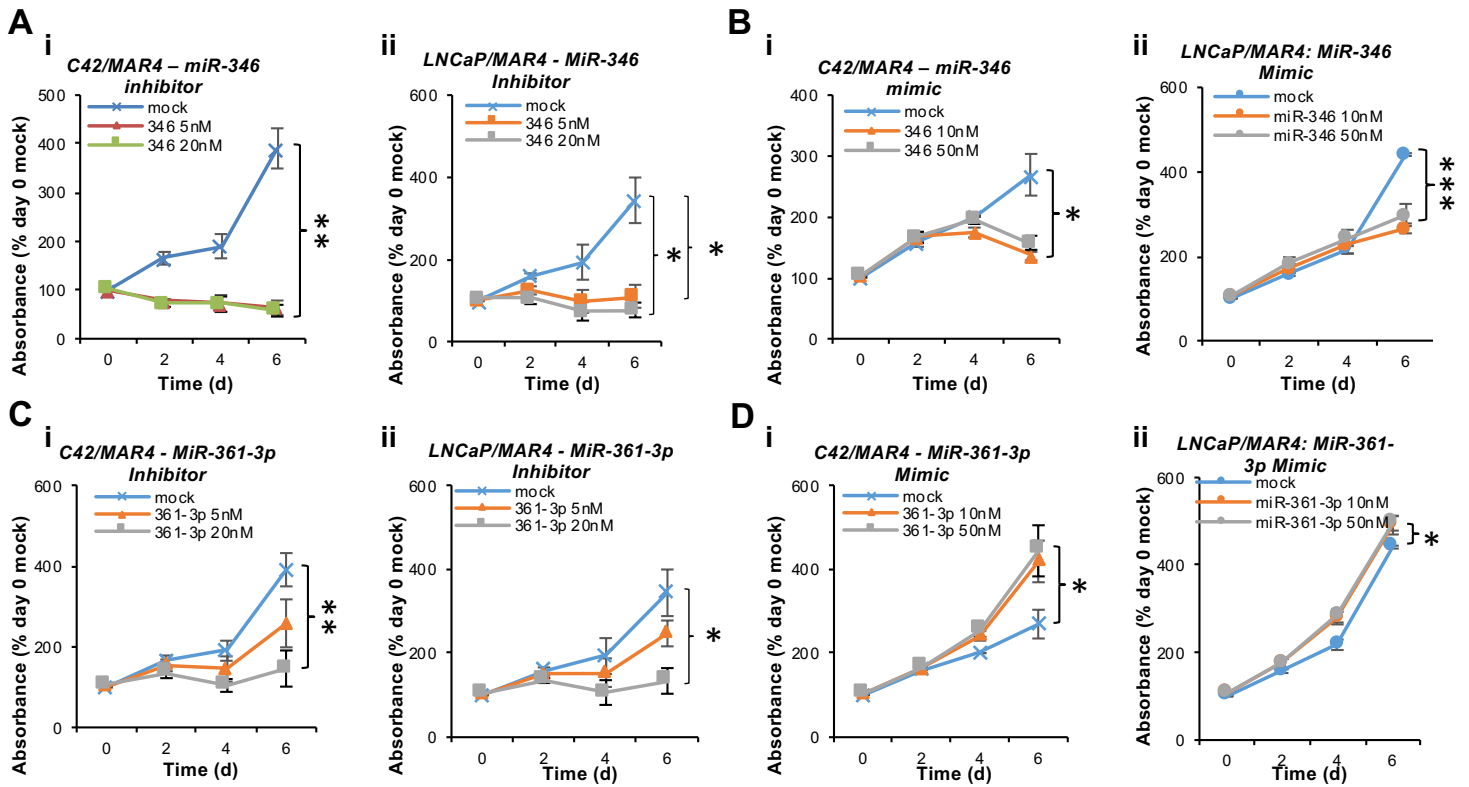

**Figure S6: MiR-346, -361-3p and -197 Modulate PC Cell Proliferation, and Inhibition Shows Additive Effects with AR Silencing.** (A-D) SRB proliferation assay analysis of C42/MAR4 (Ai,Bi,Ci,Di) or LNCaP/MAR4 (Aii,Bii,Cii,Dii) cells transfected with: (A) miR-346 inhibitor (5 and 20nM), (B) miR-346 mimic (10 and 50nM), (C) miR-361-3p inhibitor (5 and 20nM) or (D) miR-361-3p mimic (10 or 50nM) for 6 days. Data are presented relative to absorbance at day 0. Points: mean absorbance at 492nm for three independent experiments performed in quadruplicate  $\pm$  SEM. E-H) qRT-PCR analysis of (E) AR, (F) PSA, (G) TMPRSS2 and (H) KLK2 mRNA levels in LNCaP/ARsiRNA cells transfected with miR-197 (E,F), miR-346 (Gi,Hi) or miR-361-3p (Gii,Hii) inhibitor or mimic (20nM)  $\pm$  Doxycycline (1 $\mu$ M) for 24h. L19 was used as a normalisation gene. Columns: mean  $\pm$  SEM for three independent experiments performed in triplicate. \*  $P \leq 0.05$ , \*\*  $P \leq 0.005$ , \*\*\*  $P \leq 0.0001$ . See also Fig 3.

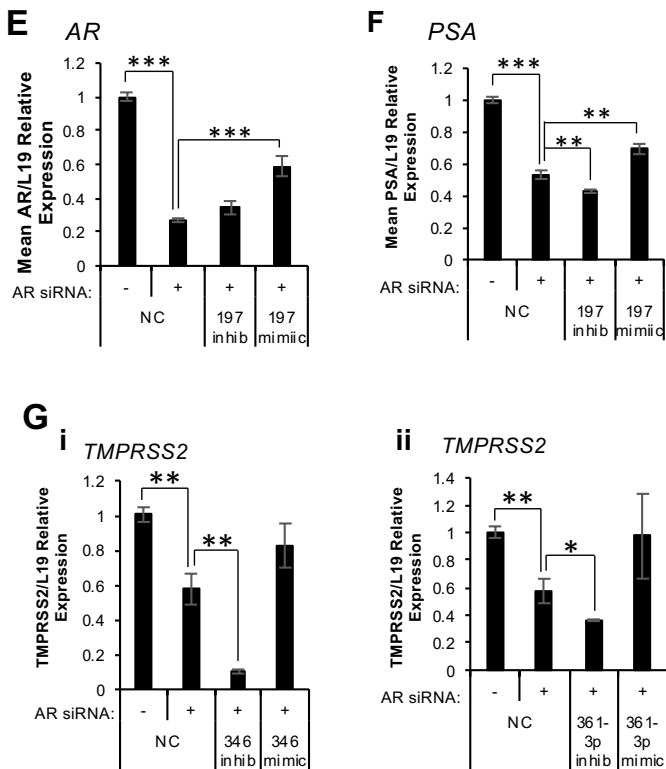

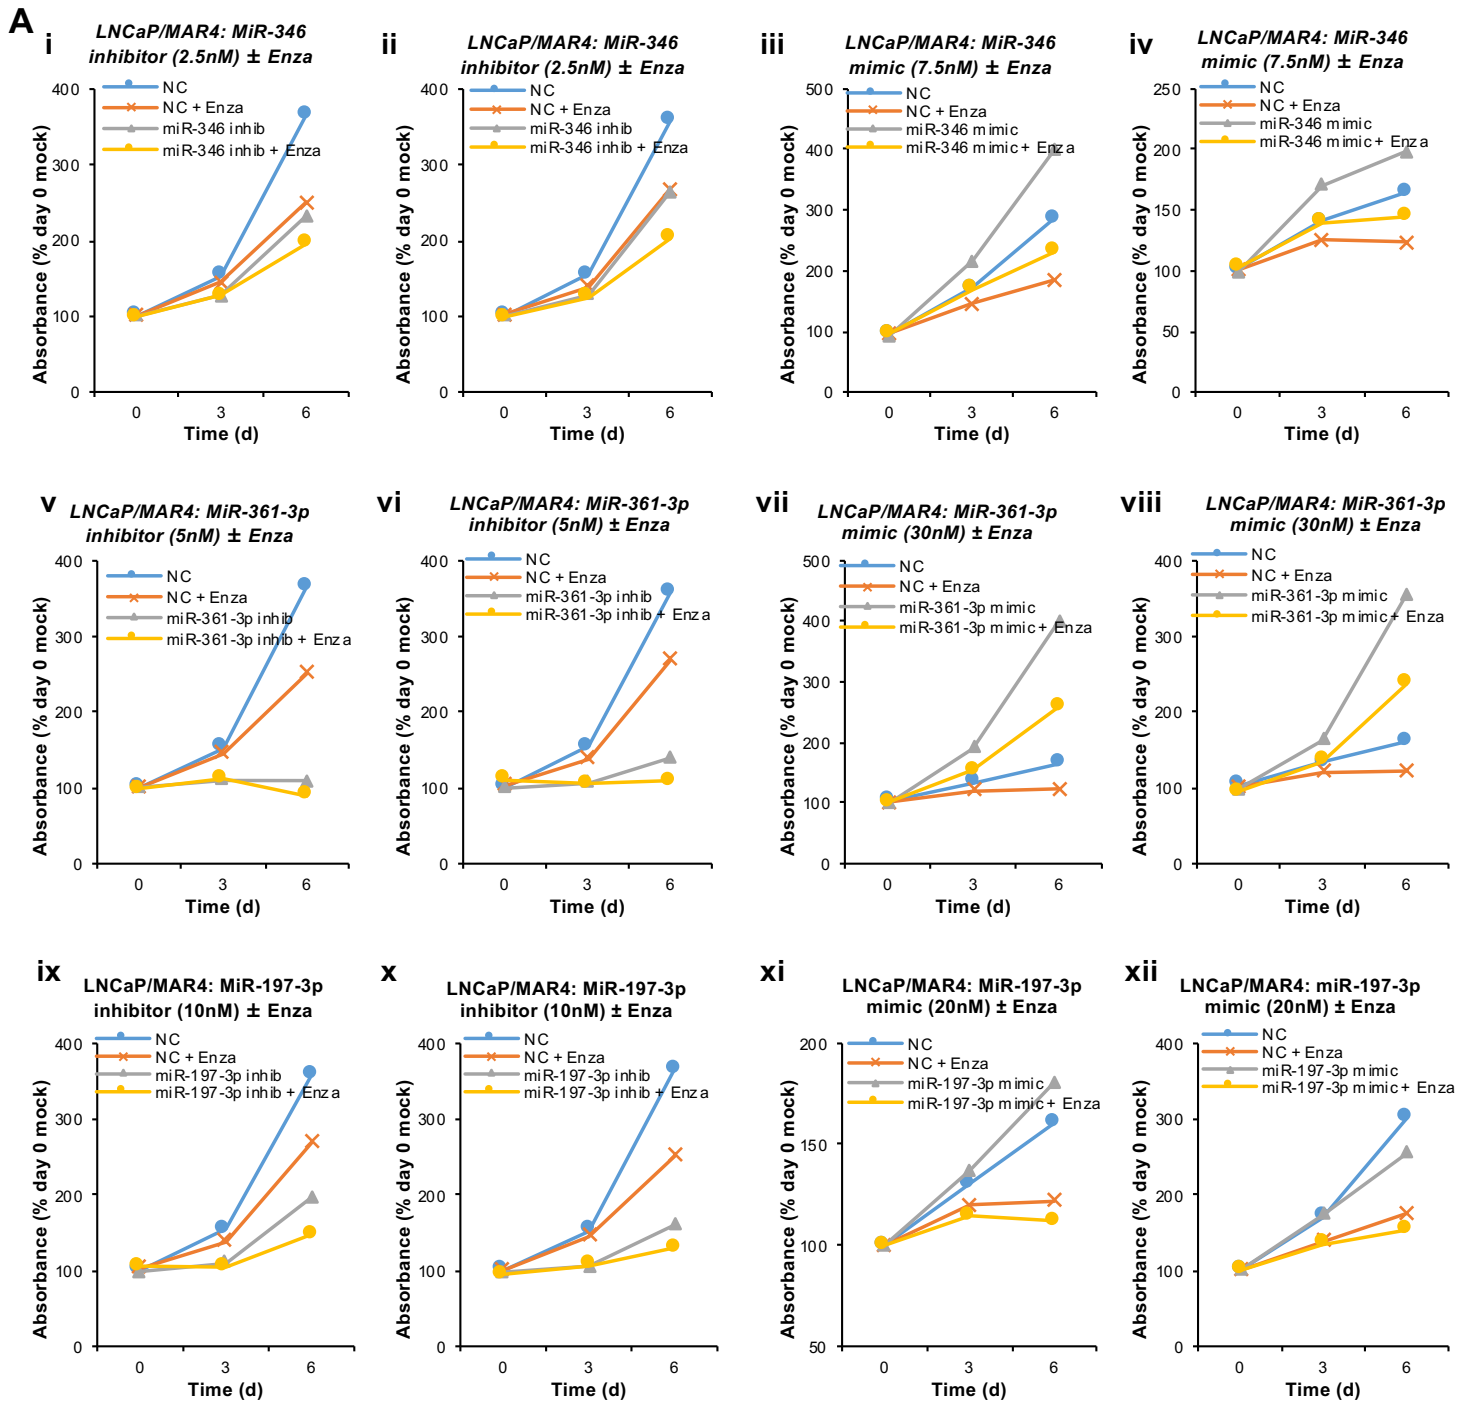

**Figure S7: Inhibitors of MiR-346, -361-3p and -197 Show Additive Effects with Enzalutamide Treatment in Prostate Cancer Cells.** SRB proliferation assay analysis of LNCaP/MAR4 cells transfected with miR-346 inhibitor (*i,ii* – 2.5nM), miR-346 mimic (*iii,iv* – 7.5nM), miR-361-3p inhibitor (*v,vi* – 5nM), miR-361-3p mimic (*vii,viii* – 30nM), miR-197-3p inhibitor (*ix,x* – 10nM), or miR-197-3p mimic (*xi,xii* – 20nM) ± Enzalutamide (0.8µM) for 6 days. Data are presented relative to absorbance at day 0 and two additional biological replicates are shown. Representative results are shown in Fig 4.

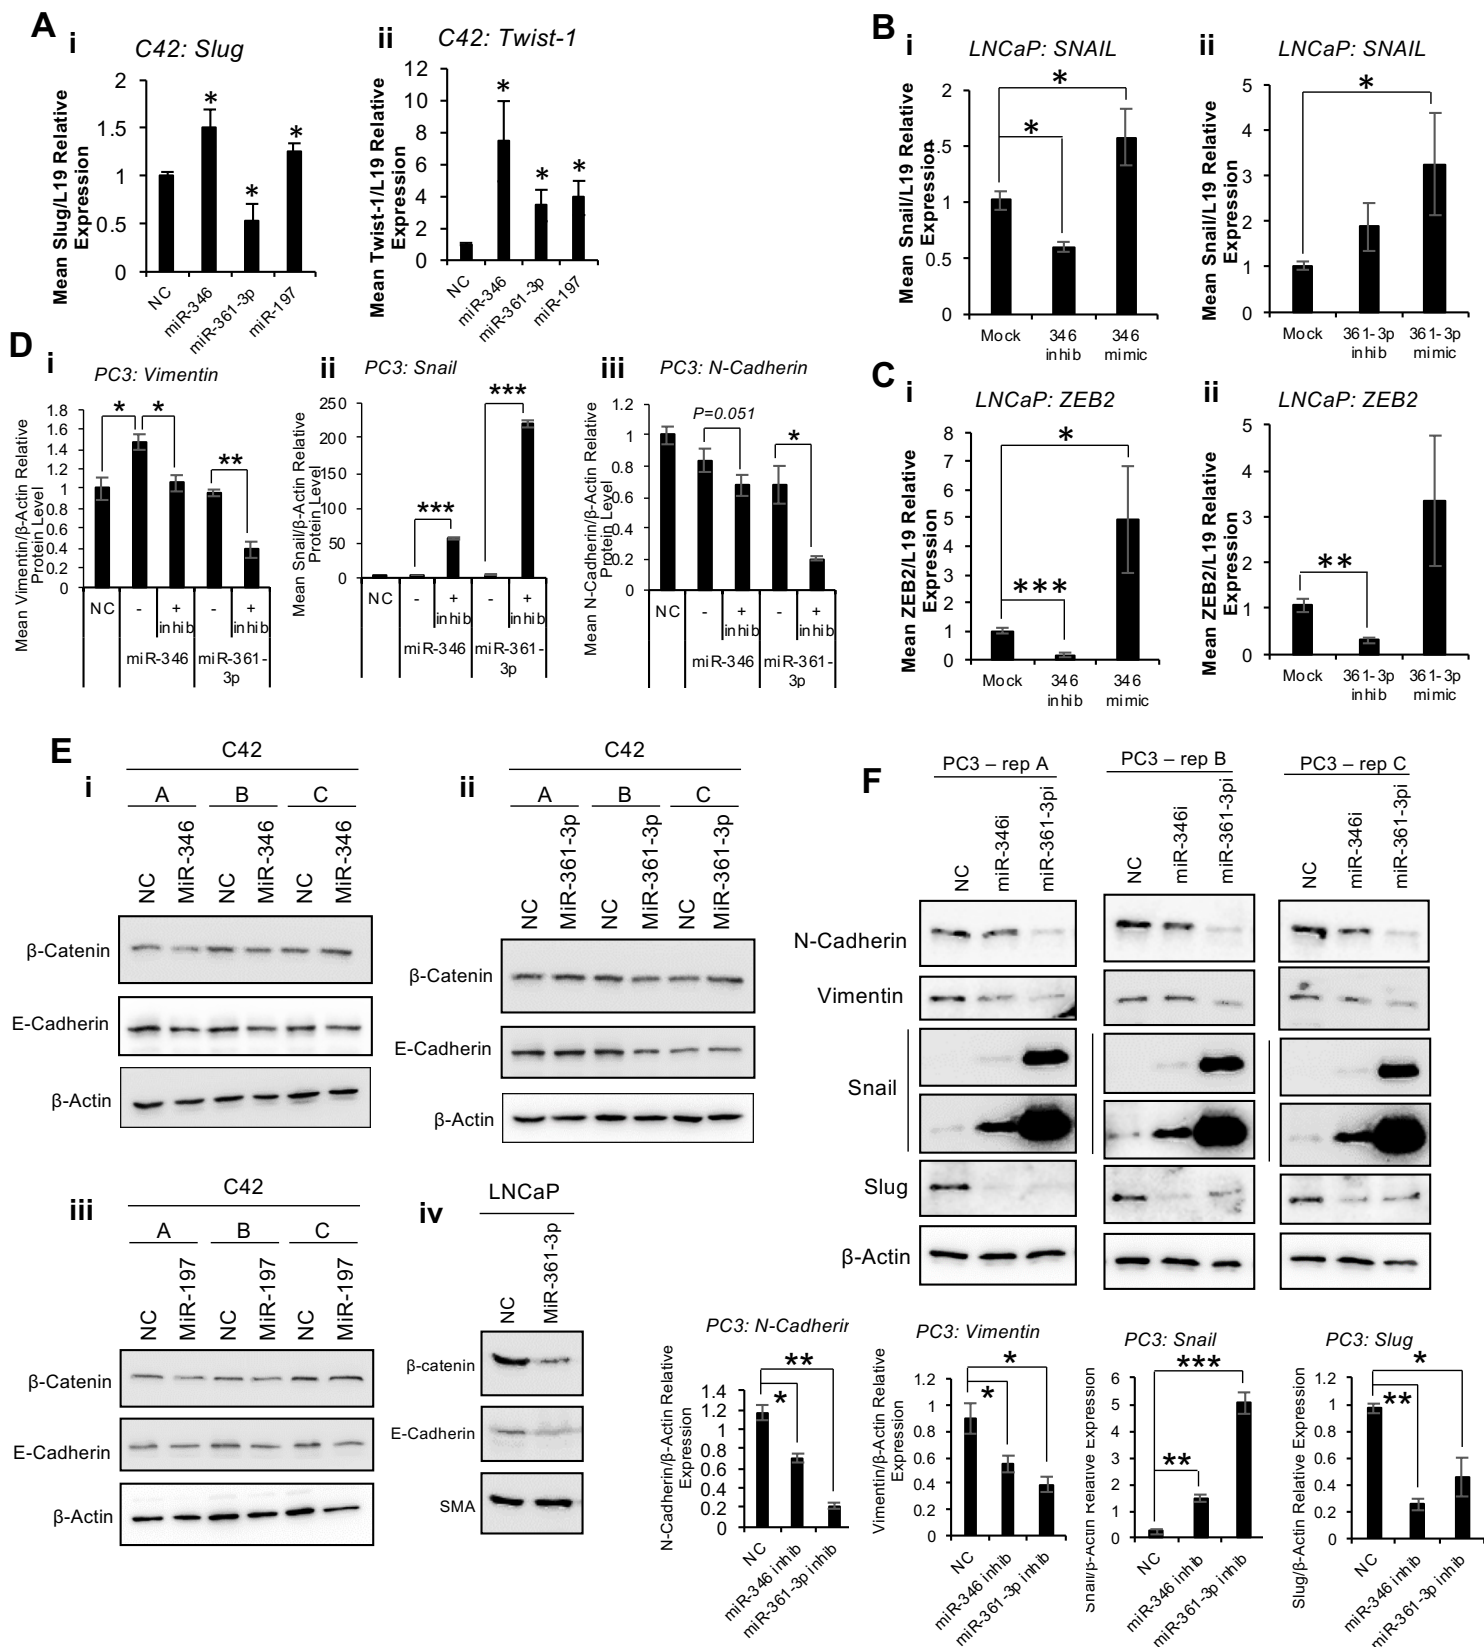

**Figure S8: MiR-346, -361-3p and -197 Increase Migration and Invasion of Prostate Cancer Cells Through Induction of a Unique EMT Protein Profile.** A) qRT-PCR analysis of Slug (i) and Twist-1 (ii) mesenchymal marker mRNA levels in C42 cells transfected with miR-346, -361-3p or -197-3p mimics (20nM) for 96h. L19 was used as a normalisation gene. B, C) qRT-PCR analysis of Snail (B) and ZEB2 (C) mesenchymal marker mRNA levels in LNCaP cells transfected with miR-346 (i) or -361-3p (ii) inhibitors or mimics (20nM) for 96h. L19 was used as a normalisation gene. (A, B, C) Columns: mean  $\pm$  SEM for three independent experiments performed in triplicate. D) Quantification of Western blot analysis of (i) Vimentin, (ii) Snail and (iii) N-Cadherin protein levels in PC3 cells transfected with miR-346 or -361-3p mimic (20nM)  $\pm$  inhibitor (20nM) for 96h.  $\beta$ -actin was used as a control for loading. Densitometry was performed using Image J software. Columns: mean relative protein levels from three independent experiments  $\pm$  SEM. E) Western blot analysis of  $\beta$ -Catenin and E-Cadherin protein levels in C42 (i, ii, iii) and LNCaP (iv) cells transfected with miR-346 (i), miR-361-3p (ii, iv) or miR-197 (iii) mimic for 72h.  $\beta$ -actin was used as a control for loading. Representative blots of three independent experiments are shown. Densitometry was performed using Image J software and relative protein levels are displayed (Fig 5Eii). F) Western blot analysis of mesenchymal marker proteins N-Cadherin, Vimentin, Snail and Slug in PC3 cells transfected with miR-346 or -361-3p inhibitor (20nM) for 96h.  $\beta$ -actin was used as a control for loading. Results of three independent experiments are shown. Densitometry was performed using Image J software and relative protein levels are displayed. Columns: mean relative protein levels from three independent experiments  $\pm$  SEM. \*  $P \leq 0.05$ , \*\*  $P \leq 0.005$ , \*\*\*  $P \leq 0.0001$ . See also Fig S5.



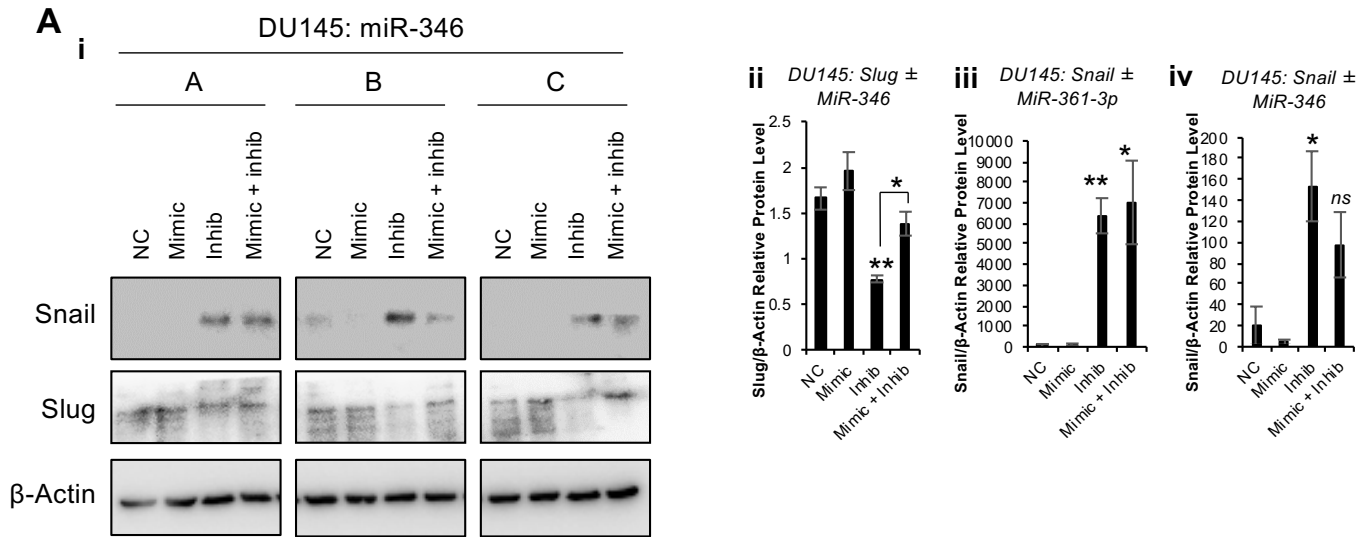

**Figure S9: Inhibition of MiR-346 Increases Snail Protein Levels in DU145 Prostate Cancer Cells.** A) Western blot analysis of mesenchymal marker proteins, Snail and Slug, in DU145 cells transfected with miR-346 mimic (20nM) and/or inhibitor (20nM) for 48h.  $\beta$ -actin was used as a control for loading. Results of three independent experiments are shown. Densitometry was performed using Image J software and relative protein levels  $\pm$  SEM of these independent experiments are displayed (ii,iii,iv). \*  $P \leq 0.05$ , \*\*  $P \leq 0.005$ . See also Fig 5.

**A**

| Chrom. | Binding Location | Strand | Gene  | Seed Start | Seed End  | Seed Type | MIR    | Total Occur | No. PC lines |
|--------|------------------|--------|-------|------------|-----------|-----------|--------|-------------|--------------|
| chr3   | CDS              | -      | GSK3B | 119582270  | 119582278 | 8mer-1a   | 197    | 13          | 4            |
| chr16  | Promoter         | -      | PKCμ  | 2156693    | 2156700   | 7mer-m8   | 197    | 7           | 4            |
| chr1   | CDS              | -      | PARP1 | 226555951  | 226555958 | 7mer-1a   | 361-3p | 5           | 4            |
| chr16  | CDS              | -      | PKCμ  | 2140195    | 2140202   | 7mer-m8   | 361-3p | 5           | 4            |
| chr1   | 3' UTR           | -      | PARP1 | 226548831  | 226548839 | 8mer-1a   | 346    | 3           | 3            |
| chr12  | 3' UTR           | +      | MDM2  | 69236143   | 69236150  | 7mer-1a   | 346    | 3           | 1            |
| chr1   | CDS              | -      | PARP1 | 226570817  | 226570824 | 7mer-m8   | 361-3p | 3           | 3            |
| chr13  | 3' UTR           | -      | LATS2 | 21548863   | 21548870  | 7mer-1a   | 197    | 2           | 2            |
| chr16  | 3' UTR           | -      | PKCμ  | 2139089    | 2139097   | 8mer-1a   | 346    | 1           | 1            |
| chr3   | 3' UTR           | -      | GSK3B | 119544271  | 119544278 | 7mer-1a   | 361-3p | 1           | 1            |

**B**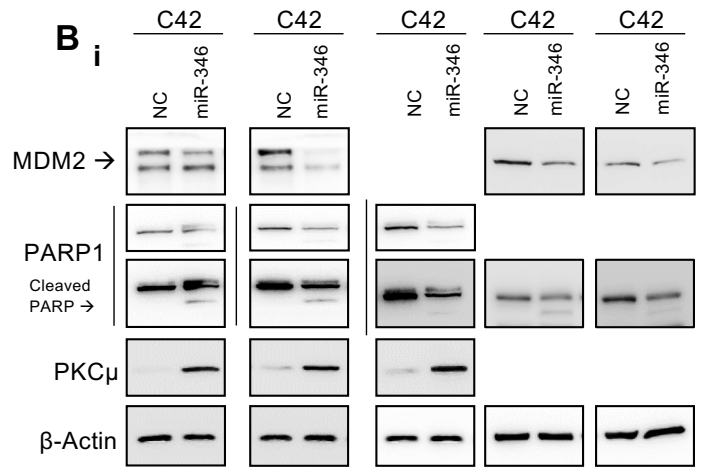**C**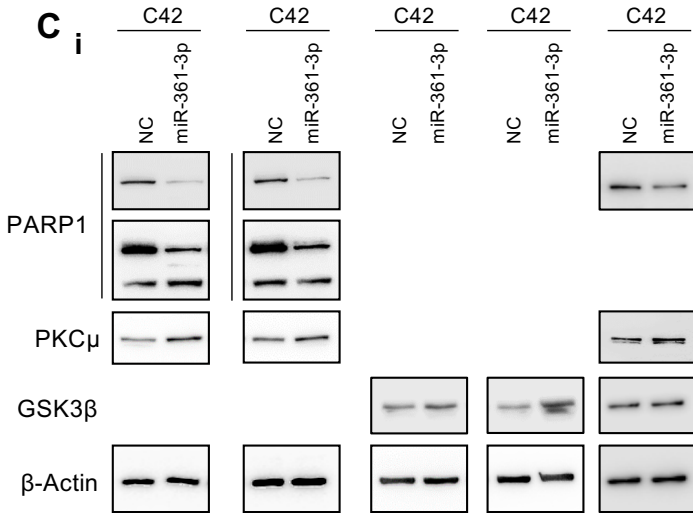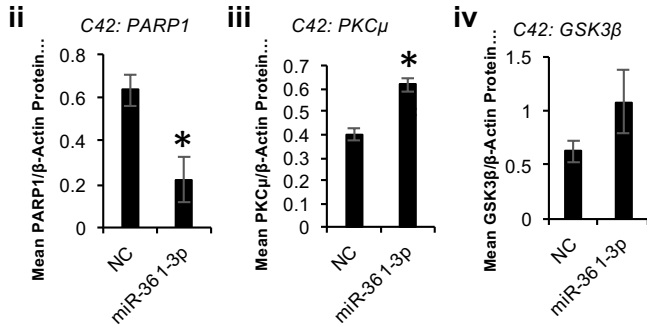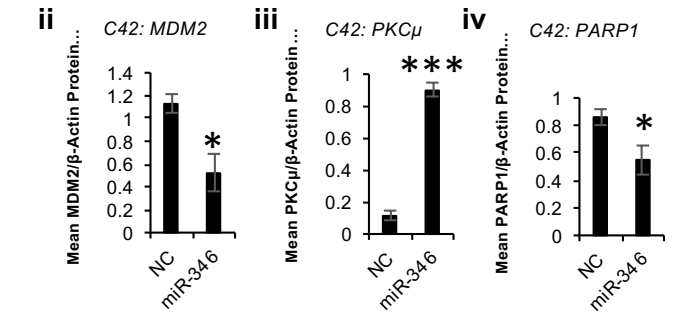**D**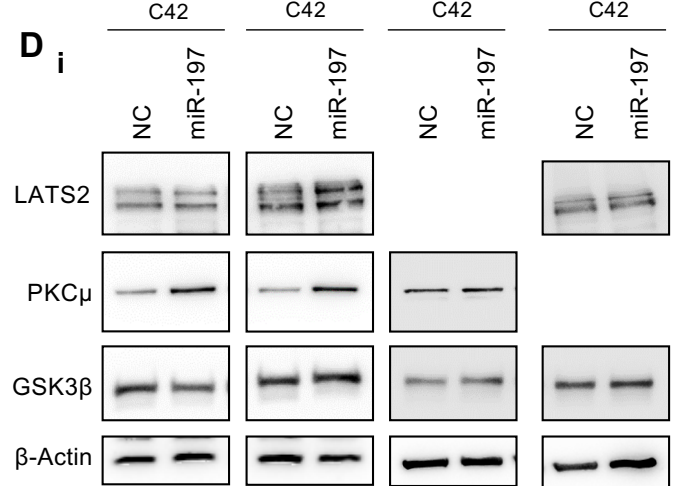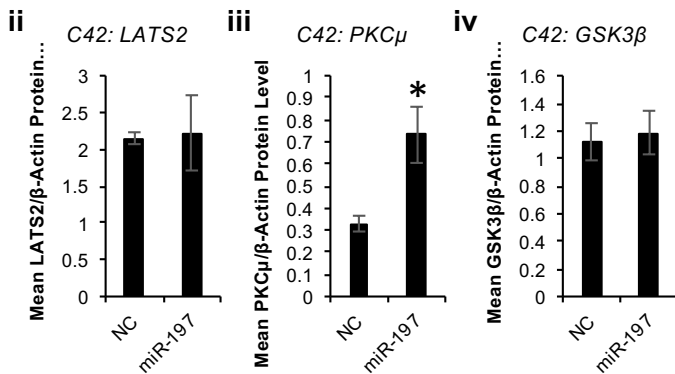

**Figure S10: MiR-346, -361-3p and -197 Target Snail-Regulatory Proteins to Induce a Unique, Pro-Invasive EMT Protein Profile.** A) Table of AGO-PAR-CLIP-identified Snail-regulatory targets of miR-346, -361-3p and -197 in prostate cancer cell lines. AGO-PAR-CLIP-seq data represented is extracted from prior published data<sup>(25)</sup> B,C,D) Western blot analysis of Snail-regulatory proteins in C42 cells transfected with miR-346 (B), -361-3p (C) or -197-3p (D) mimic (20nM) for 96h. β-actin was used as a control for loading. Images from replicate experiments are shown. Densitometry was performed using Image J software and mean relative protein levels ± SEM from 3-5 independent experiments are displayed (ii,iii,iv). \*  $P \leq 0.05$ , \*\*  $P \leq 0.005$ , \*\*\*  $P \leq 0.0001$ . See also Fig 5.

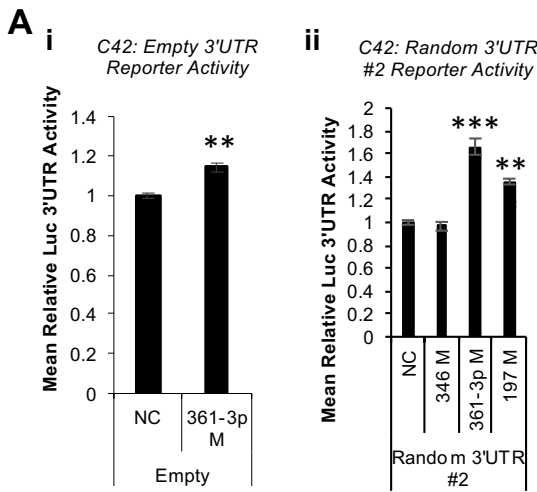

**Figure S11: MiR-346, -361-3p and -197 Directly Target ARHGDI2, TAGLN2 and YWHAZ in Prostate Cancer Cells.** A) Luciferase 3'UTR reporter assay analysis of C42 cells transfected with empty pLightSwitch (i) or pLightSwitch-Random-3'UTR #2 (ii)  $\pm$  miR-346, -361-3p or -197-3p, as appropriate, for 48h. B) Luciferase 3'UTR reporter assay analysis of HEK293T cells transfected with pLightSwitch (i), pLightSwitch-random-3'UTR (ii), pLightSwitch-ARHGDI2-3'UTR (iii), pLightSwitch-TAGLN2-3'UTR (iv) or pLightSwitch-YWHAZ-3'UTR (v)  $\pm$  miR-346, -361-3p or -197-3p mimic and/or inhibitor for 48h. (A,B) Luciferase activity was normalised to  $\beta$ -galactosidase activity to correct for transfection efficiency, and data are displayed relative to negative control miR-transfected cells. Columns: mean relative luminescence from three independent experiments performed in duplicate  $\pm$  SEM. C) Western blot analysis of TAGLN2, ARHGDI2 and YWHAZ protein levels in C42 cells transfected with miR-346 (i), -361-3p (ii) or -197 (iii) mimic (20nM) for 96h.  $\beta$ -actin was used as a control for loading and results of three independent experiments are shown. Densitometry was performed using ImageJ software and mean fold change relative to negative control-transfected cells  $\pm$  SEM is shown (iv). \*  $P \leq 0.05$ , \*\*  $P \leq 0.005$ , \*\*\*  $P \leq 0.0001$ . D) Western blot analysis of ARHGDI2, TAGLN2 and YWHAZ protein levels in LNCaP cells transfected with siRNAs (1 or 10nM) targeting i) YWHAZ, ii) TAGLN2 or iii) ARHGDI2 for 72h.  $\beta$ -actin was used as a control for loading.

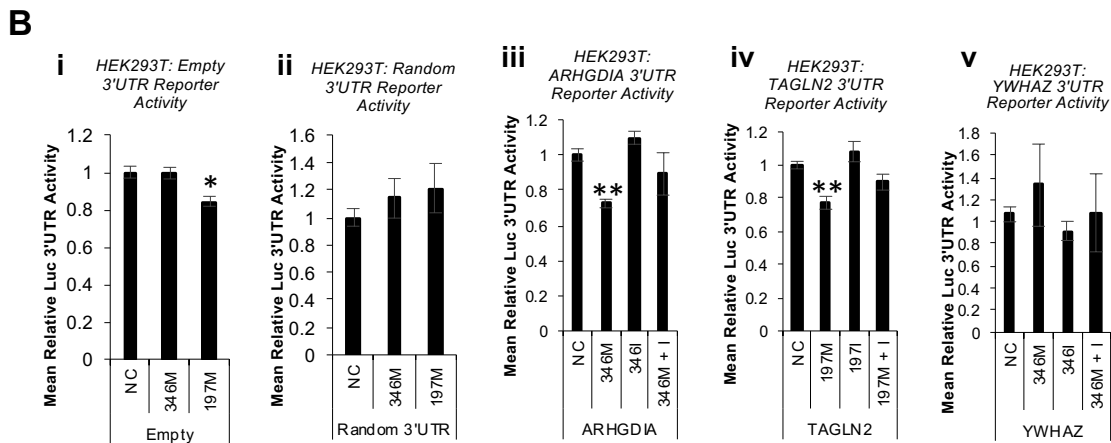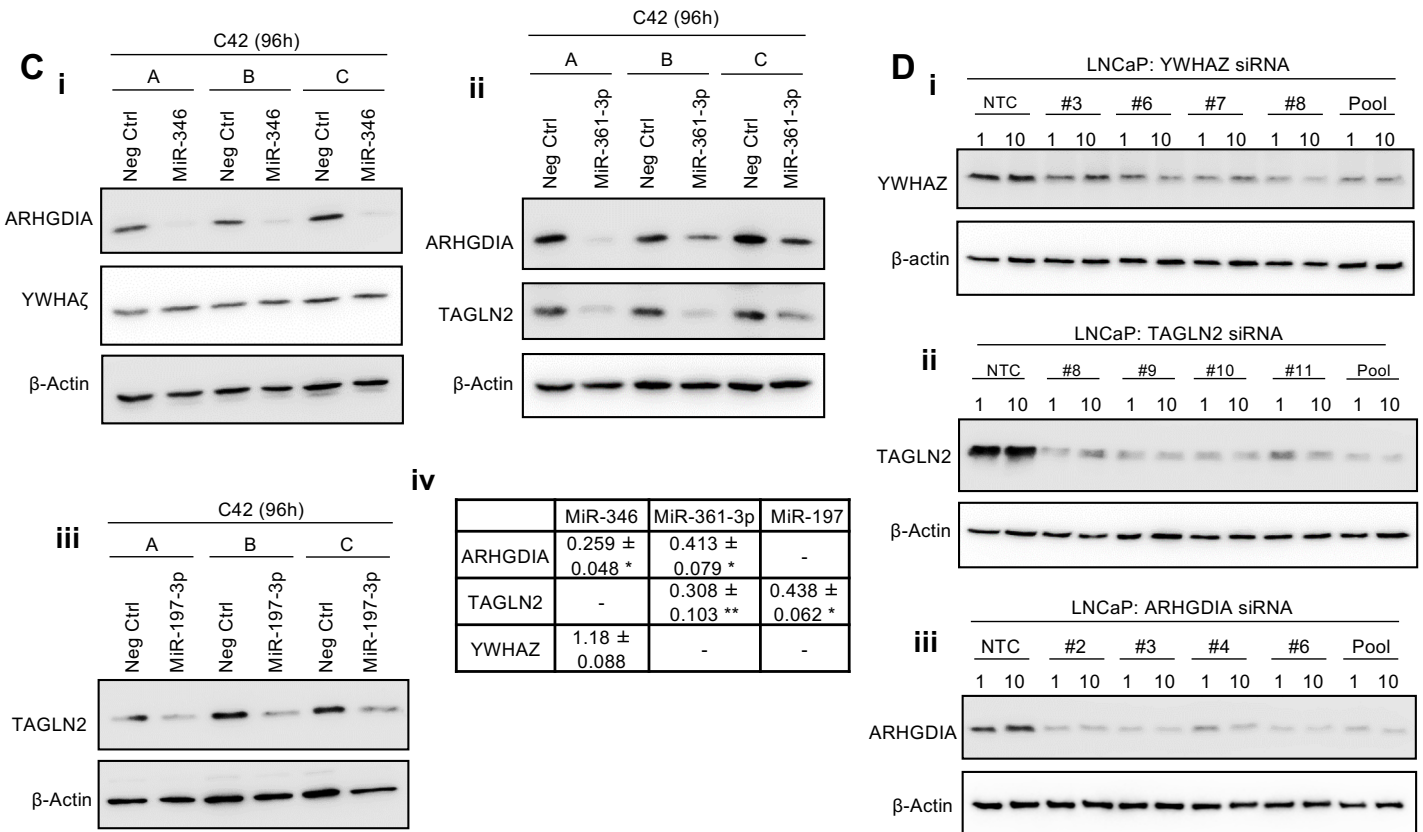

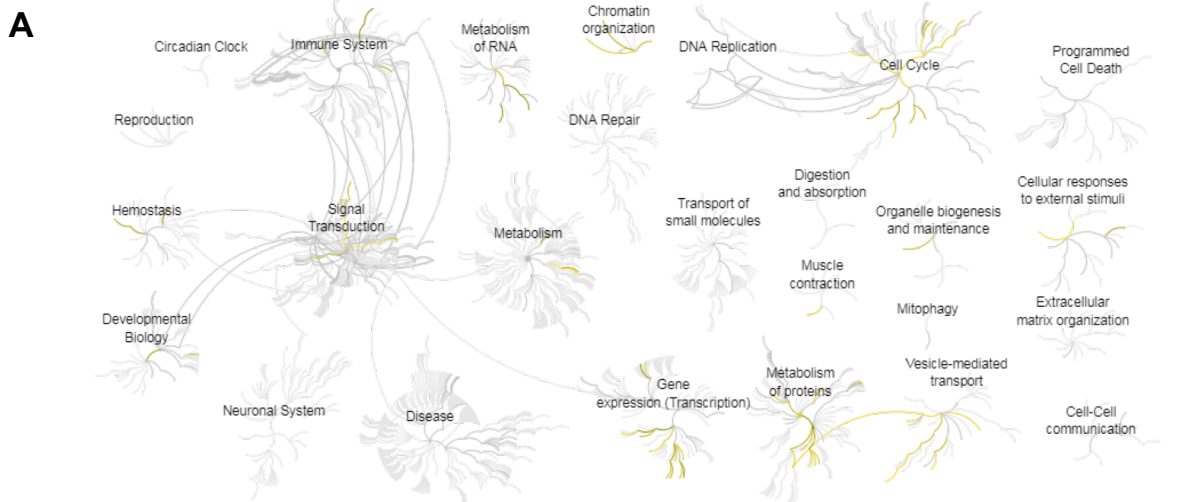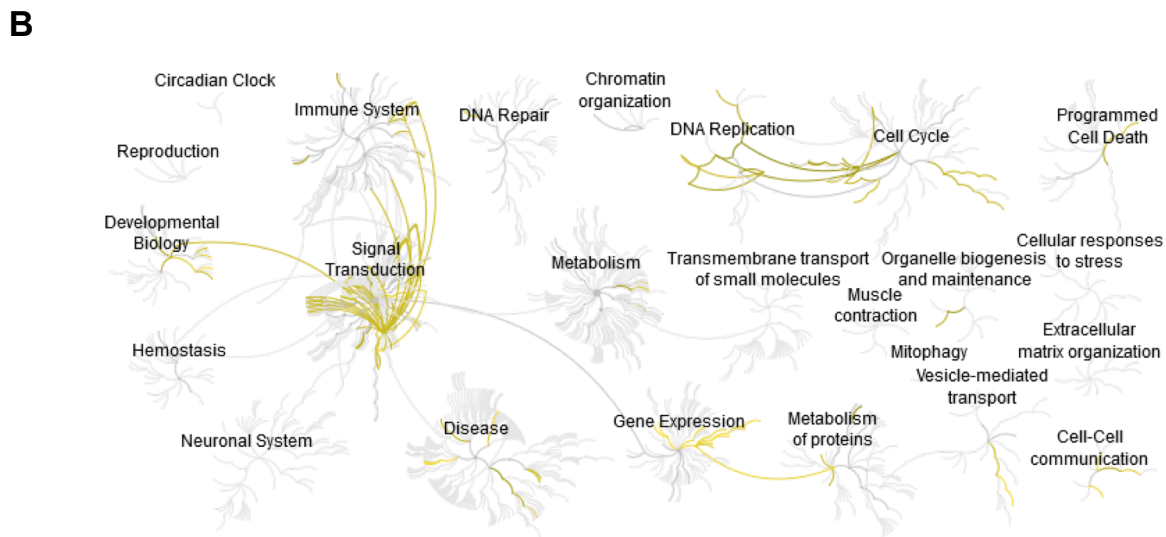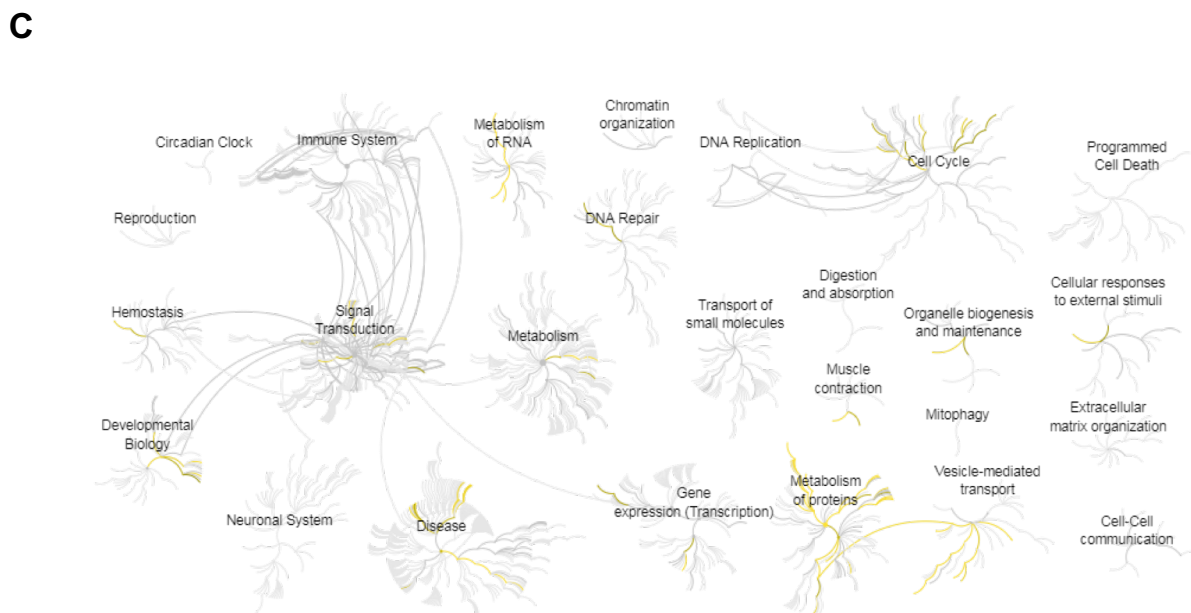

**Figure S12: miR-346, -361-3p and -197 Modify Diverse Biological Processes in Prostate Cancer.** Diagram illustrating gene ontology pathway analysis of AGO-PAR-CLIP-identified miR-346 (A), miR-361-3p (B) and miR-197 (C) targets in prostate cancer. See Fig 6.

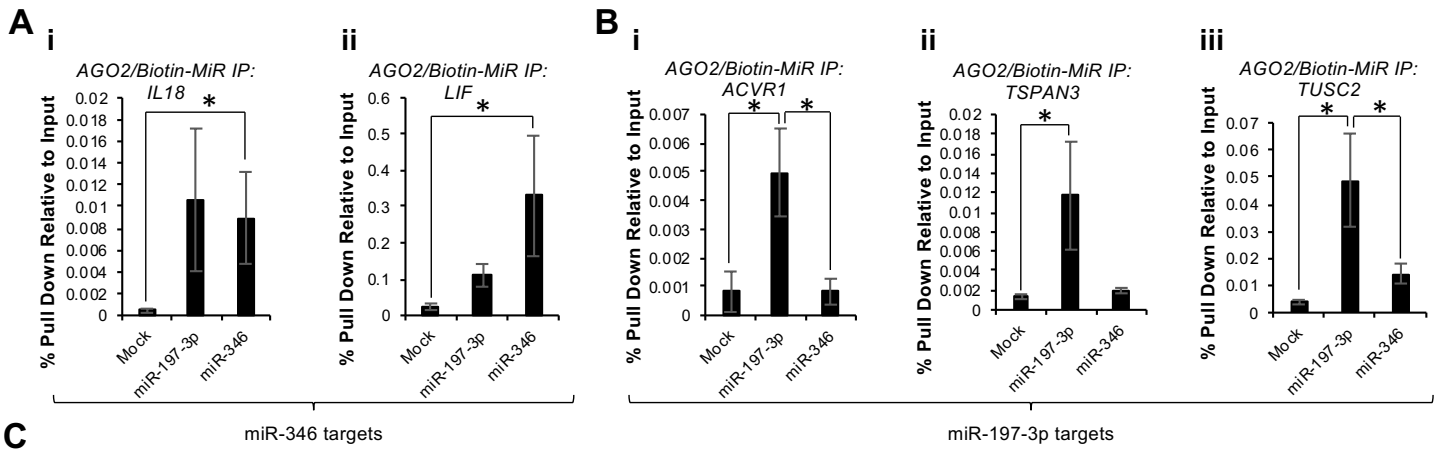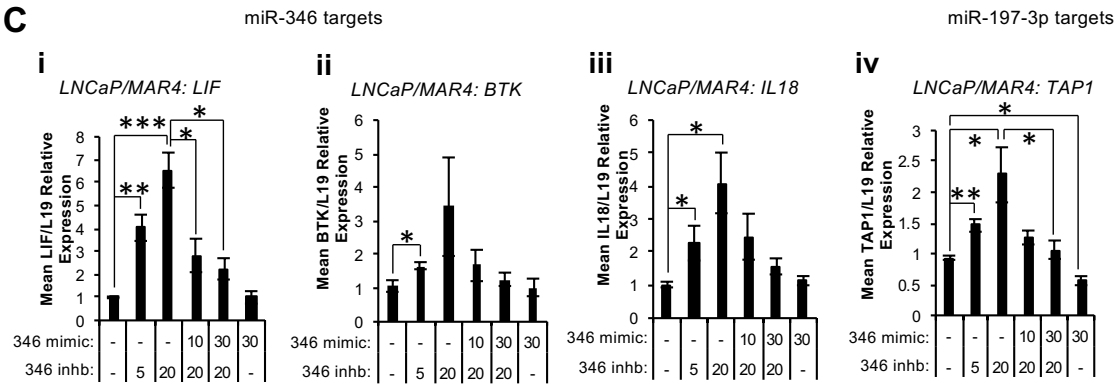

**Figure S13: Validation of Additional MiR-346, -361-3p and -197 Targets in Prostate Cancer.** A, B) AGO2/biotin-miR RNA-IP analysis of miR-346 and miR-197 association with miRTarBase-predicted miR-346 targets (A – IL18 and LIF) and miR-197 targets (B – ACVR1, TSPAN3 and TUSC2 3'UTRs. 22RV1 cells were transfected with biotin-labelled miR (200pmoles) for 24h, followed by two-step immunoprecipitation with AGO2 antibody- and streptavidin-coated

beads. RNA was extracted from input and IP samples and qRT-PCR performed for predicted miR targets as shown. Data are presented relative to input values. Columns: mean pulldown relative to input from three independent experiments  $\pm$  SEM. C) qRT-PCR analysis of (i) LIF, (ii) BTK, (iii) IL18 and (iv) TAP1 mRNA levels in LNCaP/MAR4 cells transfected with miR-346 mimic (0, 10, 30nM) and/or miR-346 inhibitor (0, 5, 20nM) for 24h. L19 was used as a normalisation gene. Columns: mean relative mRNA levels for three independent experiments performed in triplicate  $\pm$  SEM. D, E) Western blot analysis of BTK and LIF protein levels in (D) C42/MAR4 and (E) LNCaP/MAR4 cells transfected with miR-346 inhibitor and/or mimic as above for 48h.  $\beta$ -Actin was used as a control for loading. F, G) qRT-PCR analysis of miR-346 (F) and miR-361-3p (G) targets in C42/MAR4 cells transfected with miR-346 (F) or miR-361-3p (G) mimic (0, 10, 30nM) and/or inhibitor (0, 5, 20nM) for 24h. L19 was used as a normalisation gene. Columns: mean relative mRNA levels for three independent experiments performed in triplicate  $\pm$  SEM.

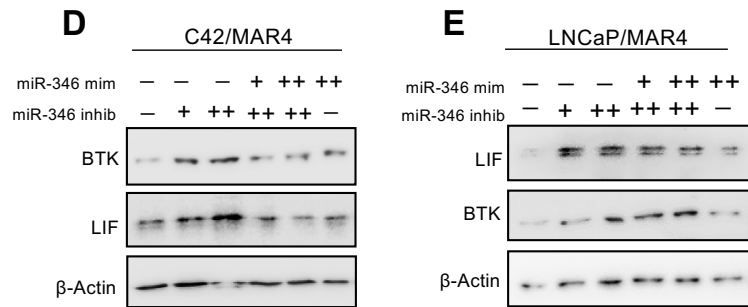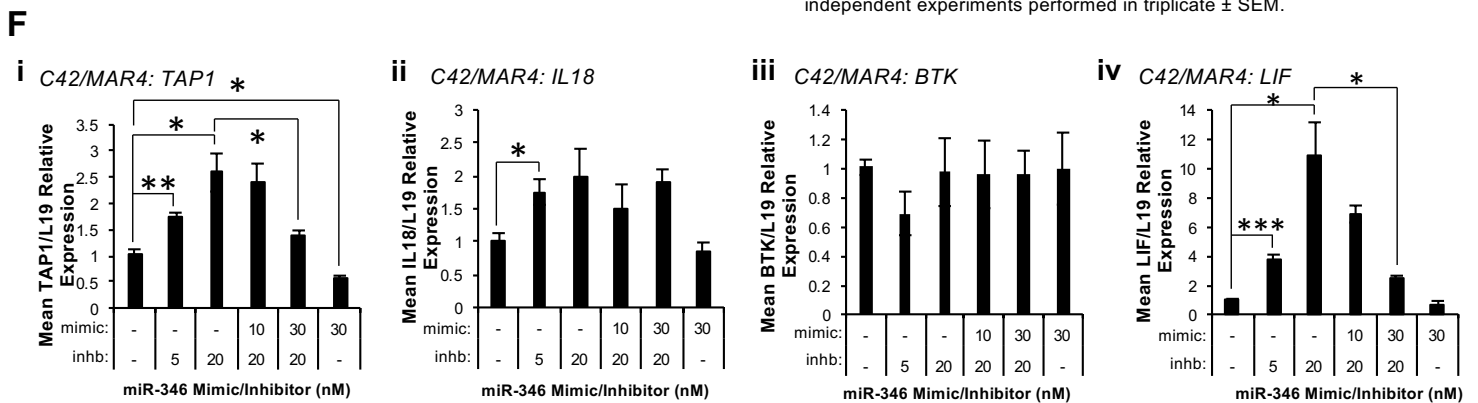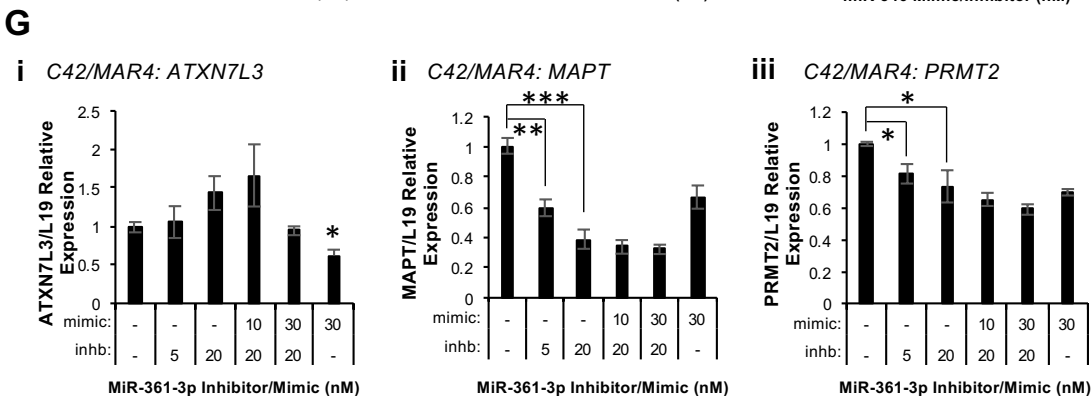

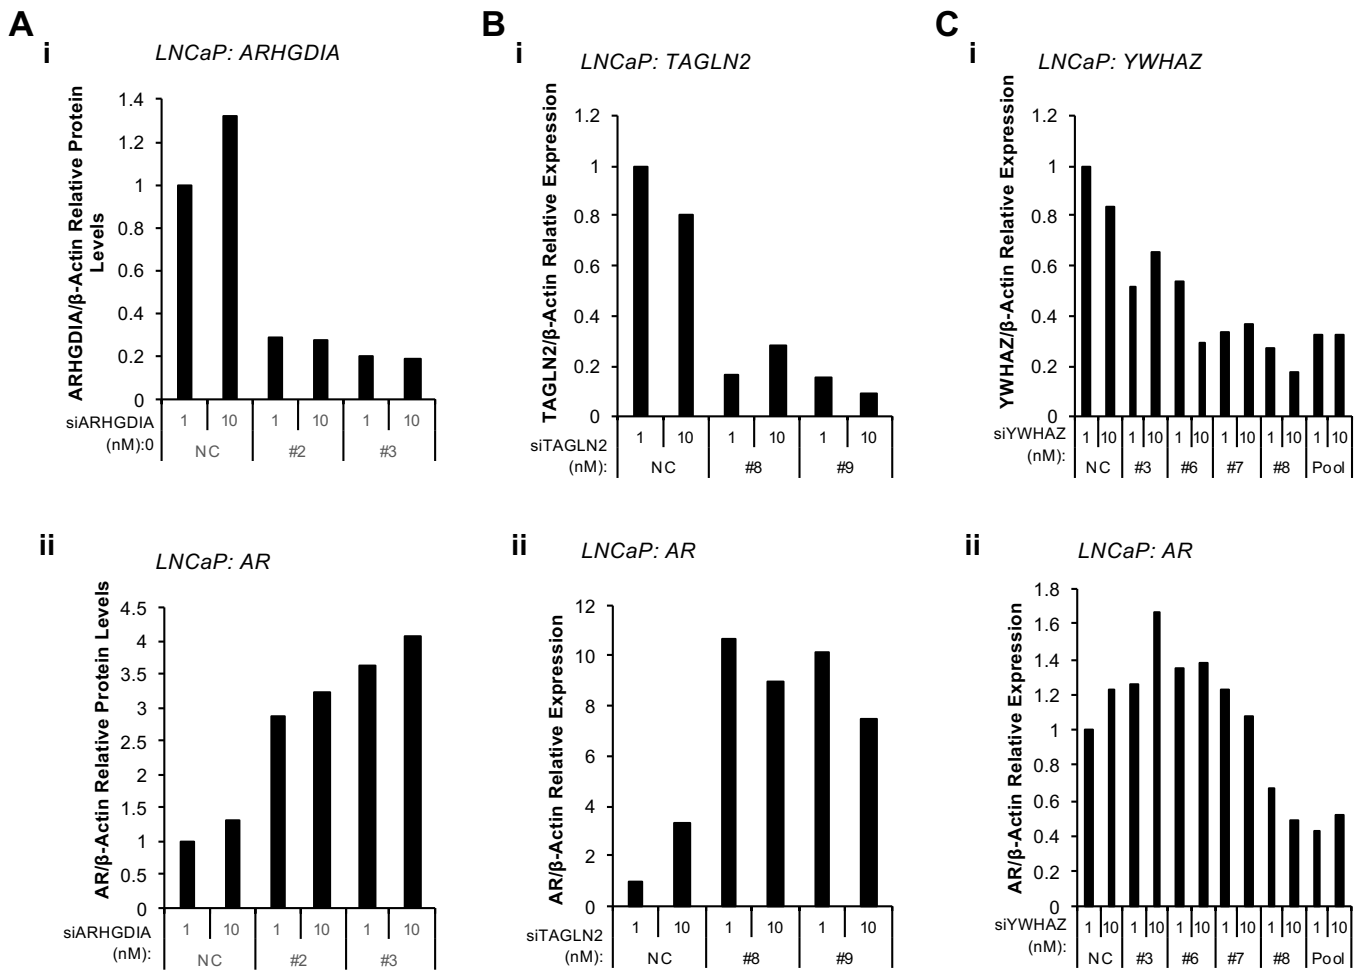

**Figure S14: siRNA-Mediated Downregulation of ARHGDDIA, TAGLN2 and YWHAZ modulates AR Protein Levels in Prostate Cancer Cells.** Quantification of Western blot analysis of ARHGDDIA, TAGLN2, YWHAZ and AR protein levels in LNCaP cells transfected with siRNAs (1 or 10nM) targeting A) YWHAZ, B) TAGLN2 or C) ARHGDDIA for 72h.  $\beta$ -actin was used as a control for loading. Quantification was performed using ImageJ software.



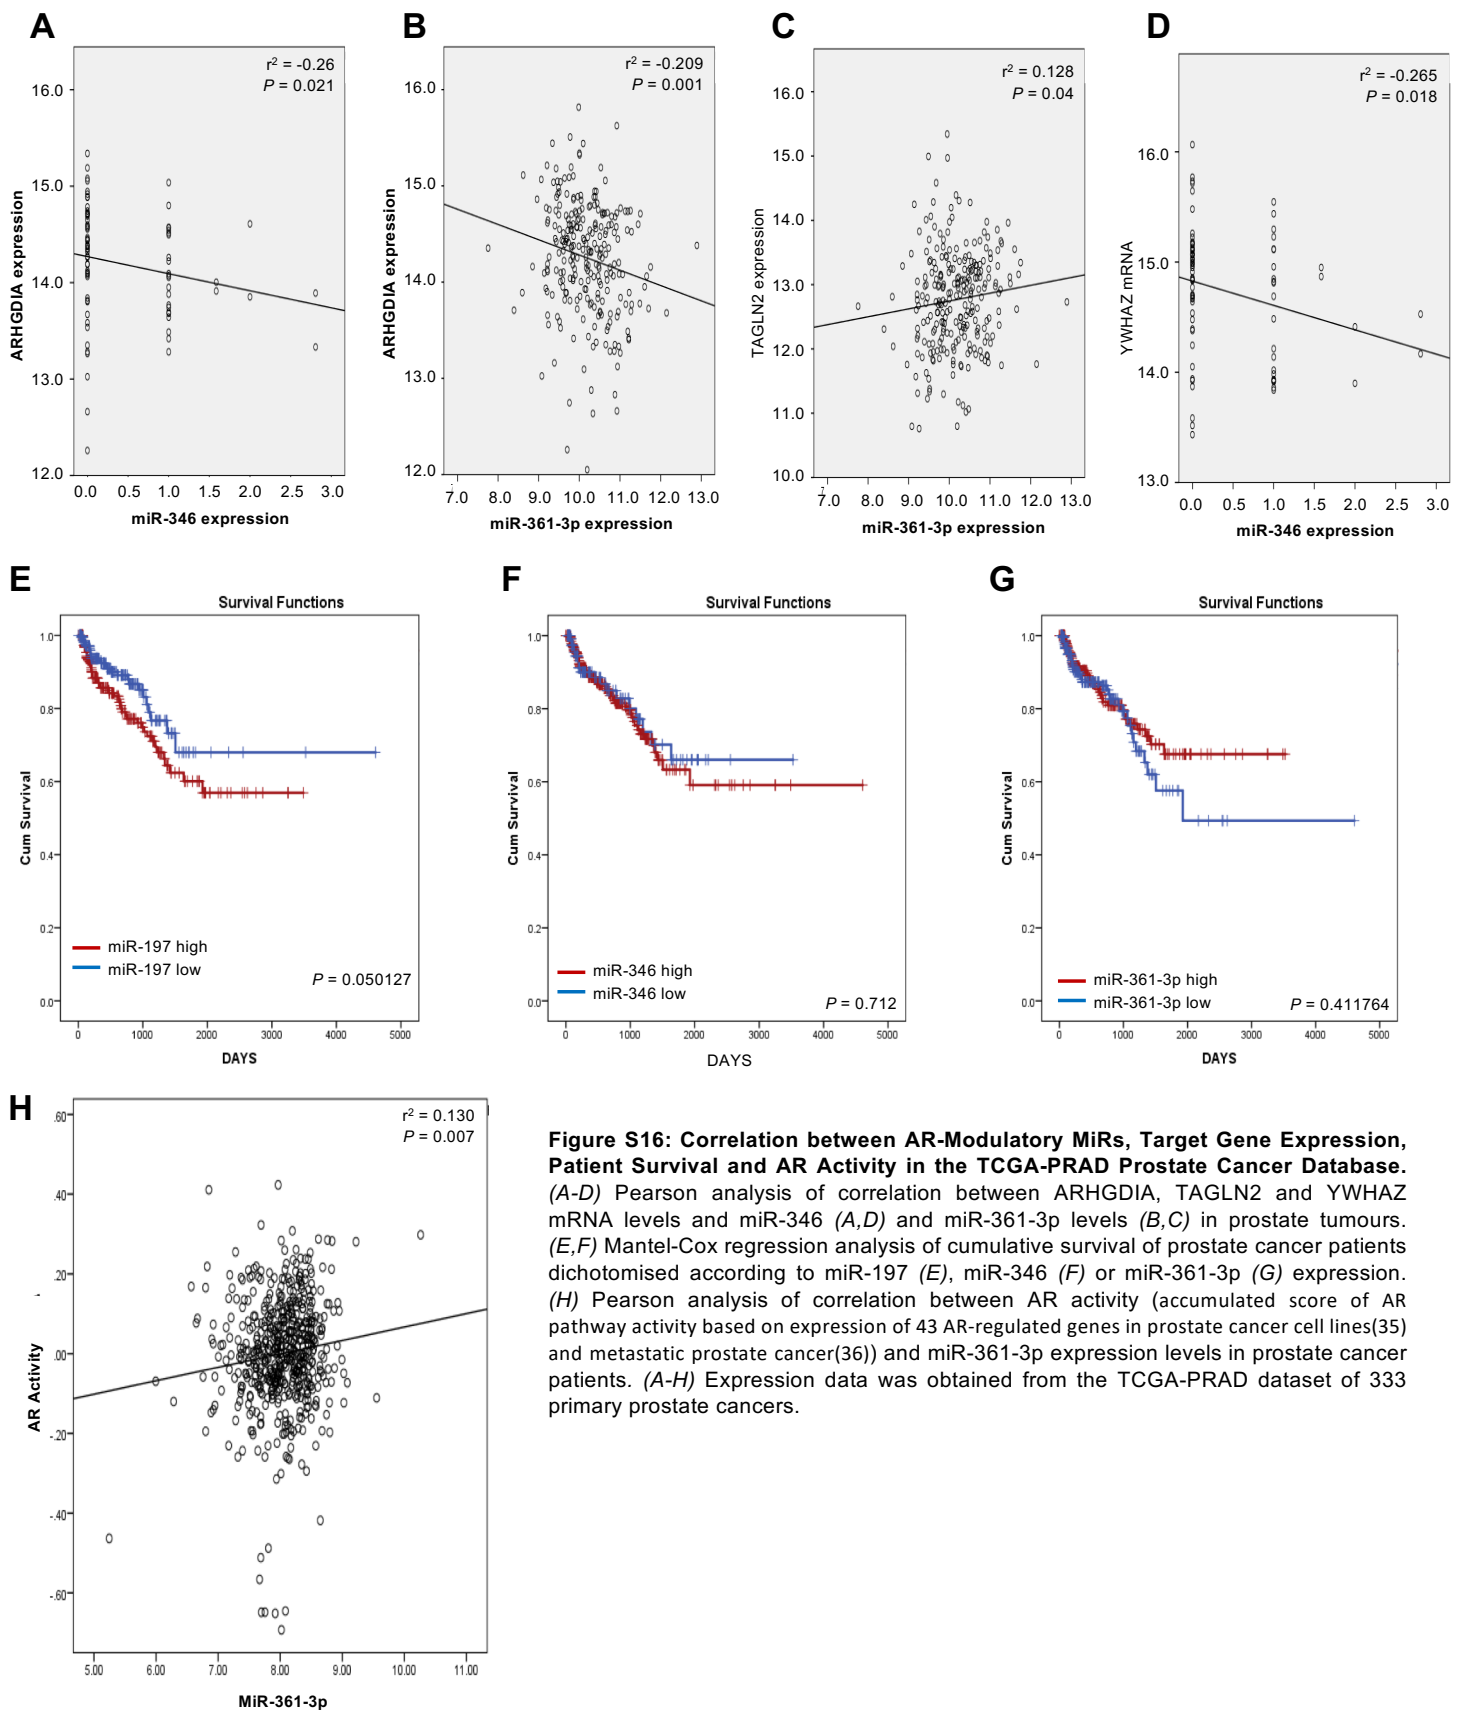

**Figure S16: Correlation between AR-Modulatory MiRs, Target Gene Expression, Patient Survival and AR Activity in the TCGA-PRAD Prostate Cancer Database.** (A-D) Pearson analysis of correlation between ARHGDI<sub>A</sub>, TAGLN2 and YWHAZ mRNA levels and miR-346 (A,D) and miR-361-3p levels (B,C) in prostate tumours. (E,F) Mantel-Cox regression analysis of cumulative survival of prostate cancer patients dichotomised according to miR-197 (E), miR-346 (F) or miR-361-3p (G) expression. (H) Pearson analysis of correlation between AR activity (accumulated score of AR pathway activity based on expression of 43 AR-regulated genes in prostate cancer cell lines(35) and metastatic prostate cancer(36)) and miR-361-3p expression levels in prostate cancer patients. (A-H) Expression data was obtained from the TCGA-PRAD dataset of 333 primary prostate cancers.



| Target         |         | Sequence                       |
|----------------|---------|--------------------------------|
| ACVR1          | Forward | 5'AATCCCCGAGACGTGGAGTA 3'      |
|                | Reverse | 5' AATCCCCGAGACGTGGAGTA 3'     |
| AR             | Forward | 5'-CTGCCCCATCCACGTTGTCCTGCT-3' |
|                | Reverse | 5'GACTCAGATGCTCCAACGCCTCCAC-3' |
| AR 6.9kb 3'UTR | Forward | 5' CCTACAGTGAAGTGCCTGGG 3'     |
|                | Reverse | 5' TCCCTCCTGCTGCCAGATTA 3'     |
| ARHGDI A       | Forward | 5'GGATGAGCACTCGGTCAACTA 3'     |
|                | Reverse | 5'GGCCTCCTTGACTTTTCGCAG 3'     |
| ATXN7L3        | Forward | 5' CCAGAACCCCAATTCCCCTC 3'     |
|                | Reverse | 5' CAGGGACCTTGTGCACATCT 3'     |
| BTK            | Forward | 5' TGTGTTCCACACCTCAGAGC 3'     |
|                | Reverse | 5' TGCAGTGAAGGTGCATTCT 3'      |
| DRG1           | Forward | 5' CAAGACAGGTGATGCTCGAA 3'     |
|                | Reverse | 5' GTCCCAAAGGTTTCAGGACA 3'     |
| E-Cadherin     | Forward | 5' ATTTTCCCTCGACACCCGAT 3'     |
|                | Reverse | 5' TCCCAGGCGTAGACCAAGA 3'      |
| IL18           | Forward | 5' TTGACCAAGGAAATCGGCCT 3'     |
|                | Reverse | 5' CCATACCTCTAGGCTGGCTAT 3'    |
| KLK2           | Forward | 5' CCTCACGTTCTGGCATCACTT 3'    |
|                | Reverse | 5' CGGCCAGGTGAGTTCCAA 3'       |
| LIF            | Forward | 5' ACCTGGACAAGCTATGTGGC 3'     |
|                | Reverse | 5' ACAGCACGTTGCTAAGGAGG 3'     |
| MAPT           | Forward | 5' ATGCACCAAGACCAAGAGGG 3'     |
|                | Reverse | 5' CCGCTGTTGGAGTGCTCTTA 3'     |
| N-Cadherin     | Forward | 5' AGCCAACCTTAACTGAGGAGT 3'    |
|                | Reverse | 5' GGCAAGTTGATTGGAGGGATG 3'    |
| PRMT2          | Forward | 5' AGGGAGTACAGCCAGAGGAG 3'     |
|                | Reverse | 5' CCACATGGTTTGCCGGAATG 3'     |
| PSA            | Forward | 5' TTGTCTTCCTCACCTGTCC 3'      |
|                | Reverse | 5' AGCTGTGGCTGACCTGAAAT 3'     |
| Slug           | Forward | 5' CGAACTGGACACACATACAGTG 3'   |
|                | Reverse | 5' CTGAGGATCTCTGGTTGTGGT 3'    |
| Snail          | Forward | 5' TCGGAAGCCTAACTACAGCGA 3'    |
|                | Reverse | 5' AGATGAGCATTGGCAGCGAG        |
| TAGLN2         | Forward | 5' ATCCCAACTGGTTCCCTAAGAA 3'   |
|                | Reverse | 5' CCCATCTGTAAACCCGATCAG 3'    |
| TAP1           | Forward | 5' GTTCGAAGCTTTGCCAACGA 3'     |
|                | Reverse | 5' CAGCTGCCACCAATGTAGA 3'      |
| TMPRSS2        | Forward | 5'-AATCGGTGTGTTCCCTCTAC-3'     |
|                | Reverse | 5'-GCGGCTGTACAGATCC-3'         |
| TSPAN3         | Forward | 5' ATGTGTACACGCTCATCCCT 3'     |
|                | Reverse | 5' CAGGATGATGACAAACGTGGC 3'    |
| TSPAN13        | Forward | 5' GCGCCCTCAACCTGCTTTA 3'      |
|                | Reverse | 5' ACTCGGAGACTGGAAATCAGC 3'    |
| TUSC2          | Forward | 5'GCCGCGGCTCTATGTTCTAT 3'      |
|                | Reverse | 5' CACGATGCCCTGAGGAATCA 5'     |
| Twist-1        | Forward | 5' GTCCGACGCTTACGAGGAG 3'      |
|                | Reverse | 5' GCTTGAGGGTCTGAATCTTGCT 3'   |
| Vimentin       | Forward | 5' AGTCCACTGAGTACCGGAGAC 3'    |
|                | Reverse | 5' CATTTCACGCATCTGGCGTTC 3'    |
| YWHAZ          | Forward | 5' CCTGCATGAAGTCTGTAACCTGAG 3' |
|                | Reverse | 5' GACCTACGGGCTCCTACAACA 3'    |
| ZEB2           | Forward | 5' GCGATGGTCATGCAGTCAG 3'      |
|                | Reverse | 5' CAGGTGGCAGGTCATTTTCTT 3'    |

Table S1: Primer sequences for qRT-PCR

| MiR Inhibitor               | C42 B score total | LNCaP B score total | Actual sum score | Effect on AR Reporter Luc |
|-----------------------------|-------------------|---------------------|------------------|---------------------------|
| hsa-miR-378c                | -8.45             | -17.27              | -25.72           | Down                      |
| hsa-miR-361-3p              | -12.85            | -11.57              | -24.42           | Down                      |
| hsa-miR-26b*                | -9.78             | -12.99              | -22.78           | Down                      |
| hsa-miR-143*                | -15.22            | -7.05               | -22.27           | Down                      |
| hsa-miR-197                 | -9.88             | -9.38               | -19.26           | Down                      |
| hsa-let-7b*                 | -10.36            | -8.01               | -18.37           | Down                      |
| hsa-miR-203                 | -3.63             | -14.57              | -18.20           | Down                      |
| hsa-miR-346                 | -11.97            | -4.63               | -16.60           | Down                      |
| hsa-miR-593*                | -10.52            | -5.99               | -16.51           | Down                      |
| hsa-miR-1260                | -7.13             | -8.47               | -15.60           | Down                      |
| hsa-miR-324-3p              | -9.51             | -5.71               | -15.22           | Down                      |
| hsa-miR-96*                 | -1.25             | -13.31              | -14.56           | Down                      |
| hsa-miR-16                  | 4.46              | 10.03               | 14.49            | Up                        |
| hsa-miR-621                 | -4.40             | -9.70               | -14.10           | Down                      |
| hsa-miR-1271                | -7.82             | -6.14               | -13.96           | Down                      |
| hsa-miR-133a                | -11.17            | -2.76               | -13.93           | Down                      |
| hsa-miR-1227                | -5.98             | -7.15               | -13.14           | Down                      |
| hsa-miR-548q                | -13.18            | 0.36                | -12.83           | Down                      |
| hsa-miR-516b                | 11.15             | 1.68                | 12.83            | Up                        |
| hsa-miR-2113                | -8.02             | -4.45               | -12.48           | Down                      |
| hsa-miR-518a-5p,hsa-miR-527 | 7.56              | 3.92                | 11.48            | Up                        |
| hsa-miR-664                 | -3.20             | -8.20               | -11.40           | Down                      |
| hsa-miR-195                 | 1.45              | 9.67                | 11.12            | Up                        |
| hsa-miR-610                 | 8.74              | 2.09                | 10.83            | Up                        |
| hsa-miR-1225-3p             | -7.59             | -3.05               | -10.64           | Down                      |
| hsa-miR-135b*               | 10.79             | -0.18               | 10.61            | Up                        |
| hsa-miR-1229                | -4.33             | -6.26               | -10.60           | Down                      |
| hsa-miR-1914                | -7.48             | -3.03               | -10.51           | Down                      |
| hsa-miR-744                 | 5.10              | 5.39                | 10.49            | Up                        |
| hsa-miR-766                 | -7.53             | -2.95               | -10.48           | Down                      |

**TableS2: MicroRNA Inhibitors Modulating AR Activity in LNCaP and C42 Cell Lines.** Values represent mean score in each cell line. Negative value indicates reduction in AR activity, positive value indicates increase in AR activity. B Score method as previously described (31).

| MiR                                                                                                                     | Location of Seed Binding Site within AR 6.9kb 3'UTR          | Type of MiR Site | Sequence of site                                                                           | V7 | V1 | V4 | V9 | V567es | WT |
|-------------------------------------------------------------------------------------------------------------------------|--------------------------------------------------------------|------------------|--------------------------------------------------------------------------------------------|----|----|----|----|--------|----|
| <b>WT-specific miR-346, -361-3p and -197 binding sites</b>                                                              |                                                              |                  |                                                                                            |    |    |    |    |        |    |
| miR-361-3p                                                                                                              | 787-793                                                      | 7mer-m8          | CTTGGTCCCTGGGGGCTAGACTGCT                                                                  | N  | N  | N  | N  | n      | Y  |
| miR-197                                                                                                                 | 3043-3048                                                    | 6mer (+pos 9,10) | ACTTAGCTGGGTGAGCTAGA                                                                       | N  | N  | n  | N  | n      | Y  |
| miR-197                                                                                                                 | 4308-4313                                                    | 6mer (+pos 9)    | GACTCTGCTGGTGA CTG                                                                         | n  | n  | N  | N  | n      | y  |
| <b>WT/variant-shared miR-346, -361-3p and -197 binding sites (only WT and v567es sites are shared – both in exon 8)</b> |                                                              |                  |                                                                                            |    |    |    |    |        |    |
| miR-346                                                                                                                 | 3185-3190                                                    | 7mer-a1          | GCTGGGCAGCAGACAGCTGCCA                                                                     | n  | n  | n  | n  | y      | Y  |
| miR-346                                                                                                                 | 6283-6288                                                    | 6mer (+pos 9,11) | GCAGGAGGGAGCAGACTATGT                                                                      | n  | n  | n  | n  | y      | Y  |
| miR-361-3p                                                                                                              | 407-412                                                      | 7mer-a1 (+pos 9) | AAGATTATCTGGGGA AAT                                                                        | N  | N  | N  | N  | y      | Y  |
| miR-361-3p                                                                                                              | 5772-5777                                                    | 8mer             | TGTCTCTAGCCTGGGGAAT TAA                                                                    | N  | N  | N  | N  | y      | Y  |
| miR-361-3p                                                                                                              | 6070-6075                                                    | 8mer             | GAAGTGCCTGGG GGGTTGTCC                                                                     | N  | N  | N  | N  | y      | Y  |
| <b>Variant-specific miR-346, -361-3p and -197 binding sites</b>                                                         |                                                              |                  |                                                                                            |    |    |    |    |        |    |
| miR-361-3p                                                                                                              | 981-987 (v7 3'UTR), 978-984 (v9 3'UTR), 1268-1274 (v4 3'UTR) | 7mer             | V7: CCTGACTTGCTGGGGCCTGTCTTT<br>V9: GACTTGCTGGGGCCTGTCTTTC<br>V4: CCTGACTTGCTGGGGCCTGTCTTT | y  | n  | y  | y  | n      | N  |
| miR-197                                                                                                                 | 24-29 (v567es 3'UTR)                                         | 6mer             | AAGTCACACATGGTGA GCGTGGA                                                                   | n  | n  | n  | n  | y      | N  |
| miR-361-3p                                                                                                              | 2209-2216 (v9 3'UTR)                                         | 8mer             | CTGTGTGACCTGGGGCATGAC                                                                      | n  | n  | n  | y  | n      | n  |
| miR-346                                                                                                                 | 8353-8358 (v567es 3'UTR)                                     | 7mer-a1          | AGCAGGAGGGAGCAGACTATGTA                                                                    | n  | n  | n  | n  | y      | n  |

**TableS3: Table of miR-346, -361-3p and -197-3p seed complementarity sites in wild-type and variant Androgen Receptor 3'UTRs.** MiR-346, -361-3p and -197-3p seed complementarity sites are highlighted in yellow, green and purple, respectively. Y = presence of miR sites, N = absence of miR site. Nucleotide numbers refer to WT AR 6.9kb 3'UTR, unless otherwise stated.

| MiR binding location | Strand | Target Gene | Gene Type   | Seed Start | Seed End  | Seed Type | No of Pca lines (/5) |                                 |
|----------------------|--------|-------------|-------------|------------|-----------|-----------|----------------------|---------------------------------|
| NC_RNA               | -      | RP6-99M1.2  | lincRNA     | 45605615   | 45605622  | 7mer-1a   | 5                    | DU145, PC3, LNCaP, 22RV1, LAPC4 |
| Intron               | -      | Intron      | Intron      | 133013410  | 133013418 | 8mer-1a   | 5                    | DU145, PC3, LNCaP, 22RV1, LAPC4 |
| 3_UTR                | -      | PPP2CA      | Prot coding | 133532948  | 133532955 | 7mer-1a   | 5                    | DU145, PC3, LNCaP, 22RV1, LAPC4 |
| CDS                  | +      | MYL6        | Prot coding | 56553804   | 56553811  | 7mer-1a   | 5                    | DU145, PC3, LNCaP, 22RV1, LAPC4 |
| CDS                  | -      | TRAPPC1     | Prot coding | 7835098    | 7835105   | 7mer-1a   | 5                    | DU145, PC3, LNCaP, 22RV1, LAPC4 |
| 3_UTR                | -      | HNRNPK      | Prot coding | 86584688   | 86584695  | 7mer-m8   | 4                    | PC3, LNCaP, 22RV1, LAPC4        |
| 3_UTR                | -      | YWHAZ       | Prot coding | 101932896  | 101932904 | 8mer-1a   | 4                    | PC3, LNCaP, 22RV1, LAPC4        |
| Promoter             | -      | YWHAZP2     | Promoter    | 127314982  | 127314990 | 8mer-1a   | 4                    | PC3, LNCaP, 22RV1, LAPC4        |
| CDS                  | -      | TMED4       | Prot coding | 44621091   | 44621098  | 7mer-1a   | 4                    | PC3, LNCaP, 22RV1, LAPC4        |
| 3_UTR                | -      | TUBA1B      | Prot coding | 49525117   | 49525124  | 7mer-1a   | 4                    | DU145, PC3, 22RV1, LAPC4        |
| 3_UTR                | -      | F11R        | Prot coding | 160966039  | 160966046 | 7mer-1a   | 4                    | PC3, LNCaP, 22RV1, LAPC4        |
| 3_UTR                | -      | ENO1        | Prot coding | 8938683    | 8938690   | 7mer-1a   | 4                    | DU145, PC3, 22RV1, LAPC4        |
| 3_UTR                | -      | EIF4G2      | Prot coding | 10825904   | 10825911  | 7mer-1a   | 4                    | DU145, PC3, 22RV1, LAPC4        |
| NC_RNA               | +      | SNORA81     | snoRNA      | 186504493  | 186504500 | 7mer-1a   | 4                    | DU145, PC3, 22RV1, LAPC4        |
| 3_UTR                | -      | YWHAZ       | Prot coding | 101931200  | 101931208 | 8mer-1a   | 4                    | DU145, PC3, 22RV1, LAPC4        |
| 3_UTR                | -      | TXN2        | Prot coding | 36863472   | 36863479  | 7mer-m8   | 4                    | PC3, LNCaP, 22RV1, LAPC4        |
| CDS                  | -      | AARS        | Prot coding | 70316576   | 70316583  | 7mer-m8   | 4                    | DU145, PC3, 22RV1, LAPC4        |
| 3_UTR                | +      | NFIC        | Prot coding | 3465087    | 3465094   | 7mer-m8   | 4                    | DU145, PC3, 22RV1, LAPC4        |
| CDS                  | +      | HIST2H2AC   | Prot coding | 149858916  | 149858923 | 7mer-1a   | 4                    | PC3, LNCaP, 22RV1, LAPC4        |
| NC_RNA               | -      | LINC00657   | lincRNA     | 34635627   | 34635634  | 7mer-1a   | 3                    | PC3, 22RV1, LAPC4               |

**TableS4: Table of miR-346 binding site identified by AGO-HITS-PAR-CLIP in at least 3 of 5 prostate cancer cell lines. Seed sequence = GUCUGCC. AGO-PAR-CLIP-seq data represented is extracted from prior published data<sup>(25)</sup>**

| Chrom | Strand | Target Gene  | Gene Type   | Seed Start | Seed End  | Seed Type | No of Pca lines (/5) |                                 |
|-------|--------|--------------|-------------|------------|-----------|-----------|----------------------|---------------------------------|
| chr16 | +      | Intergenic   | Intergenic  | 33964106   | 33964113  | 7mer-1a   | 5                    | DU145, PC3, LNCaP, 22RV1, LAPC4 |
| chr1  | +      | RNU1-4       | snRNA       | 17067146   | 17067153  | 7mer-1a   | 5                    | DU145, PC3, LNCaP, 22RV1, LAPC4 |
| chr19 | -      | CTC-457E21.9 | antisense   | 22877682   | 22877689  | 7mer-1a   | 5                    | DU145, PC3, LNCaP, 22RV1, LAPC4 |
| chr2  | +      | RPLP0P6      | pseudogene  | 38709237   | 38709245  | 8mer-1a   | 5                    | DU145, PC3, LNCaP, 22RV1, LAPC4 |
| chr14 | +      | RNU1-27P     | snRNA       | 35016055   | 35016062  | 7mer-1a   | 5                    | DU145, PC3, LNCaP, 22RV1, LAPC4 |
| chr2  | -      | Intron       | Intron      | 133012342  | 133012349 | 7mer-1a   | 5                    | DU145, PC3, LNCaP, 22RV1, LAPC4 |
| chrX  | -      | MIR361       | miRNA       | 85158660   | 85158668  | 8mer-1a   | 5                    | DU145, PC3, LNCaP, 22RV1, LAPC4 |
| chr7  | -      | ACTB         | Prot coding | 5568195    | 5568202   | 7mer-1a   | 5                    | DU145, PC3, LNCaP, 22RV1, LAPC4 |
| chrX  | -      | BCAP31       | Prot coding | 152966277  | 152966284 | 7mer-1a   | 5                    | DU145, PC3, LNCaP, 22RV1, LAPC4 |
| chrY  | +      | Intergenic   | Intergenic  | 10035774   | 10035781  | 7mer-m8   | 4                    | DU145, PC3, 22RV1, LAPC4        |
| chr1  | -      | TAGLN2       | Prot coding | 159888415  | 159888422 | 7mer-1a   | 4                    | DU145, PC3, 22RV1, LAPC4        |
| chr10 | -      | PSAP         | Prot coding | 73577081   | 73577088  | 7mer-1a   | 4                    | DU145, PC3, 22RV1, LAPC4        |
| chr11 | -      | GANAB        | Prot coding | 62393053   | 62393060  | 7mer-1a   | 4                    | DU145, PC3, 22RV1, LAPC4        |
| chr8  | +      | NDUFB9       | Prot coding | 125555482  | 125555489 | 7mer-m8   | 4                    | DU145, PC3, 22RV1, LAPC4        |
| chr15 | -      | PKM          | Prot coding | 72491439   | 72491446  | 7mer-1a   | 4                    | DU145, PC3, 22RV1, LAPC4        |
| chr1  | -      | ICMT         | Prot coding | 6284648    | 6284655   | 7mer-1a   | 4                    | DU145, PC3, 22RV1, LAPC4        |
| chr3  | +      | EIF4G1       | Prot coding | 184053040  | 184053047 | 7mer-m8   | 4                    | DU145, PC3, 22RV1, LAPC4        |
| chr7  | -      | ACTB         | Prot coding | 5567185    | 5567192   | 7mer-1a   | 4                    | DU145, PC3, 22RV1, LAPC4        |
| chr3  | +      | PSMD2        | Prot coding | 184026763  | 184026771 | 8mer-1a   | 4                    | DU145, PC3, 22RV1, LAPC4        |
| chr7  | -      | ACTB         | Prot coding | 5566890    | 5566897   | 7mer-1a   | 4                    | DU145, PC3, 22RV1, LAPC4        |
| chr10 | -      | TIMM23       | Prot coding | 51592233   | 51592240  | 7mer-1a   | 4                    | DU145, PC3, 22RV1, LAPC4        |
| chr11 | -      | GANAB        | Prot coding | 62392945   | 62392953  | 8mer-1a   | 4                    | DU145, PC3, 22RV1, LAPC4        |
| chr11 | -      | CFL1         | Prot coding | 65622546   | 65622553  | 7mer-m8   | 4                    | DU145, PC3, 22RV1, LAPC4        |
| chr11 | -      | BCL9L        | Prot coding | 118768876  | 118768883 | 7mer-1a   | 4                    | DU145, PC3, 22RV1, LAPC4        |
| chr12 | -      | ATP5B        | Prot coding | 57039662   | 57039669  | 7mer-m8   | 4                    | DU145, PC3, 22RV1, LAPC4        |
| chr16 | +      | Intergenic   | Intergenic  | 33963425   | 33963432  | 7mer-m8   | 4                    | DU145, PC3, 22RV1, LAPC4        |
| chr11 | +      | MALAT1       | lincRNA     | 65269654   | 65269661  | 7mer-m8   | 4                    | DU145, PC3, 22RV1, LAPC4        |
| chr11 | +      | MALAT1       | lincRNA     | 65269026   | 65269033  | 7mer-1a   | 4                    | DU145, PC3, 22RV1, LAPC4        |
| chr3  | -      | RPL10AP6     | pseudogene  | 61728531   | 61728538  | 7mer-1a   | 4                    | DU145, PC3, 22RV1, LAPC4        |
| chr19 | +      | RPS19        | Prot coding | 42373164   | 42373171  | 7mer-1a   | 4                    | DU145, PC3, 22RV1, LAPC4        |
| chr6  | +      | RPL10A       | Prot coding | 35437197   | 35437205  | 8mer-1a   | 3                    | DU145, PC3, 22RV1               |

**TableS5: Table of miR-361-3p binding site identified by AGO-HITS-PAR-CLIP in at least 3 of 5 prostate cancer cell lines. Seed sequence = CCCCCAG. AGO-PAR-CLIP-seq data represented is extracted from prior published data<sup>(25)</sup>**

| MiR Binding Location | Strand | Target Gene  | Gene Type            | Seed Start | Seed End  | Seed Type | No of Pca lines interaction found in (/5) |                                 |
|----------------------|--------|--------------|----------------------|------------|-----------|-----------|-------------------------------------------|---------------------------------|
| Intron               | -      | Intron       | Intron               | 91852823   | 91852830  | 7mer-1a   | 5                                         | DU145, PC3, LNCaP, 22RV1, LAPC4 |
| NC_RNA               | +      | RP11-25K21.6 | Processed transcript | 161500916  | 161500923 | 7mer-m8   | 5                                         | DU145, PC3, LNCaP, 22RV1, LAPC4 |
| Promoter             | -      | MTRNR2L2     | Promoter             | 79947295   | 79947302  | 7mer-m8   | 5                                         | DU145, PC3, LNCaP, 22RV1, LAPC4 |
| Promoter             | -      | MTRNR2L8     | Promoter             | 10531164   | 10531171  | 7mer-m8   | 5                                         | DU145, PC3, LNCaP, 22RV1, LAPC4 |
| 3_UTR                | -      | RPS2         | Prot coding          | 2012193    | 2012200   | 7mer-1a   | 5                                         | DU145, PC3, LNCaP, 22RV1, LAPC4 |
| Intergenic           | -      | Intergenic   | Intergenic           | 13060359   | 13060366  | 7mer-1a   | 5                                         | DU145, PC3, LNCaP, 22RV1, LAPC4 |
| NC_RNA               | +      | MIR27B       | miRNA                | 97847758   | 97847765  | 7mer-1a   | 4                                         | PC3, LNCaP, 22RV1, LAPC4        |
| 3_UTR                | +      | ATP6V0E1     | Prot coding          | 172461561  | 172461568 | 7mer-1a   | 4                                         | PC3, LNCaP, 22RV1, LAPC4        |
| CDS                  | -      | KDELR1       | Prot coding          | 48893712   | 48893719  | 7mer-1a   | 5                                         | DU145, PC3, LNCaP, 22RV1, LAPC4 |
| CDS                  | -      | PABPC1       | Prot coding          | 101727758  | 101727765 | 7mer-1a   | 5                                         | DU145, PC3, LNCaP, 22RV1, LAPC4 |
| 3_UTR                | -      | RPLP0        | Prot coding          | 120636964  | 120636971 | 7mer-1a   | 5                                         | DU145, PC3, LNCaP, 22RV1, LAPC4 |
| Intergenic           | +      | Intergenic   | Intergenic           | 70108656   | 70108663  | 7mer-1a   | 4                                         | PC3, LNCaP, 22RV1, LAPC4        |
| CDS                  | -      | AP3M1        | Prot coding          | 75897975   | 75897982  | 7mer-m8   | 4                                         | PC3, LNCaP, 22RV1, LAPC4        |
| NC_RNA               | +      | C17orf76-AS1 | Processed transcript | 16344587   | 16344595  | 8mer-1a   | 3                                         | LNCaP, 22RV1, LAPC4             |
| 3_UTR                | -      | DDX39B       | Prot coding          | 31498080   | 31498087  | 7mer-m8   | 4                                         | PC3, LNCaP, 22RV1, LAPC4        |
| 3_UTR                | -      | TMEM55B      | Prot coding          | 20926298   | 20926305  | 7mer-1a   | 4                                         | PC3, LNCaP, 22RV1, LAPC4        |
| 3_UTR                | -      | SIGMAR1      | Prot coding          | 34635653   | 34635660  | 7mer-m8   | 4                                         | PC3, LNCaP, 22RV1, LAPC4        |
| CDS                  | -      | LRRC58       | Prot coding          | 120050163  | 120050170 | 7mer-1a   | 4                                         | PC3, LNCaP, 22RV1, LAPC4        |
| CDS                  | -      | FUT10        | Prot coding          | 33310784   | 33310791  | 7mer-1a   | 4                                         | PC3, LNCaP, 22RV1, LAPC4        |
| NC_RNA               | -      | CEP164P1     | pseudogene           | 45527364   | 45527372  | 8mer-1a   | 4                                         | PC3, LNCaP, 22RV1, LAPC4        |
| CDS                  | -      | DICER1       | Prot coding          | 95569746   | 95569753  | 7mer-m8   | 4                                         | PC3, LNCaP, 22RV1, LAPC4        |
| Promoter             | -      | PKD1         | Promoter             | 2156693    | 2156700   | 7mer-m8   | 4                                         | PC3, LNCaP, 22RV1, LAPC4        |
| Intron               | +      | Intron       | Intron               | 145277316  | 145277324 | 8mer-1a   | 4                                         | PC3, LNCaP, 22RV1, LAPC4        |
| 3_UTR                | -      | NDUFC1       | Prot coding          | 140211202  | 140211209 | 7mer-1a   | 4                                         | PC3, LNCaP, 22RV1, LAPC4        |
| Intron               | +      | Intron       | Intron               | 137201694  | 137201701 | 7mer-1a   | 2                                         | PC3, LNCaP                      |
| Intron               | -      | Intron       | Intron               | 85982273   | 85982280  | 7mer-m8   | 2                                         | PC3, LNCaP                      |
| Intron               | +      | Intron       | Intron               | 141282104  | 141282111 | 7mer-m8   | 2                                         | PC3, LNCaP                      |
| Intergenic           | -      | Intergenic   | Intergenic           | 133036745  | 133036752 | 7mer-1a   | 2                                         | PC3, LNCaP                      |
| Intergenic           | +      | Intergenic   | Intergenic           | 36794244   | 36794251  | 7mer-1a   | 2                                         | PC3, LNCaP                      |

**Table S6: Table of miR-197-3p binding site identified by AGO-HITS-PAR-CLIP in at least 2 of 5 prostate cancer cell lines. Seed sequence = UCACCAC.** AGO-PAR-CLIP-seq data represented is extracted from prior published data<sup>(25)</sup>

| Chrom | Sequence Start | Sequence end | MiR Binding Location | Strand | Gene ID  | Gene Type   | Seed Start | Seed End  | Seed Sequence | Seed Type | miRNA Family | Pca Cell Lines           |
|-------|----------------|--------------|----------------------|--------|----------|-------------|------------|-----------|---------------|-----------|--------------|--------------------------|
| chr17 | 79826443       | 79826496     | 3' UTR               | -      | ARHGDI1  | Prot coding | 79826460   | 79826467  | CCCCCAG       | 7mer-m8   | miR-361-3p   | DU145, PC3, 22RV1        |
| chr17 | 79826657       | 79826726     | 3' UTR               | -      | ARHGDI1  | Prot coding | 79826684   | 79826691  | CCCCCAG       | 7mer-m8   | miR-361-3p   | 22RV1, PC3               |
| chr17 | 79825598       | 79825911     | 3' UTR               | -      | ARHGDI1  | Prot coding | 79825795   | 79825803  | CCCCCAG       | 8mer-1a   | miR-361-3p   | 22RV1                    |
| chr17 | 79826487       | 79826577     | 3' UTR               | -      | ARHGDI1  | Prot coding | 79826567   | 79826574  | CCCCCAG       | 7mer-1a   | miR-361-3p   | LAPC4                    |
| chr17 | 79826142       | 79826294     | 3' UTR               | -      | ARHGDI1  | Prot coding | 79826189   | 79826196  | GUCUGCC       | 7mer-1a   | miR-346      | 22RV1, LAPC4, PC3        |
| chr17 | 79825598       | 79825911     | 3' UTR               | -      | ARHGDI1  | Prot coding | 79825660   | 79825668  | GUCUGCC       | 8mer-1a   | miR-346      | 22RV1, LAPC4, PC3        |
| chr1  | 159888176      | 159888488    | 3' UTR               | -      | TAGLN2   | Prot coding | 159888415  | 159888422 | CCCCCAG       | 7mer-1a   | miR-361-3p   | DU145, PC3, 22RV1, LAPC4 |
| chr1  | 159887984      | 159888106    | 3' UTR               | -      | TAGLN2   | Prot coding | 159888072  | 159888079 | UCACCAC       | 7mer-m8   | miR-197      | DU145, PC3, 22RV1, LAPC4 |
| chr8  | 107710117      | 107710173    | NC RNA               | -      | TAGLN2P1 | pseudogene  | 107710133  | 107710140 | UCACCAC       | 7mer-m8   | miR-197      | LAPC4, PC3               |
| chr1  | 159890189      | 159890289    | CDS                  | -      | TAGLN2   | Prot coding | 159890192  | 159890199 | UCACCAC       | 7mer-m8   | miR-197      | 22RV1                    |
| chr8  | 101932877      | 101932928    | 3' UTR               | -      | YWHAZ    | Prot coding | 101932896  | 101932904 | GUCUGCC       | 8mer-1a   | miR-346      | PC3, LNCaP, 22RV1, LAPC4 |
| chr2  | 127314952      | 127315002    | Promoter             | -      | YWHAZP2  | Promoter    | 127314982  | 127314990 | GUCUGCC       | 8mer-1a   | miR-346      | PC3, LNCaP, 22RV1, LAPC4 |
| chrX  | 63832420       | 63832459     | Promoter             | -      | YWHAZP7  | Promoter    | 63832439   | 63832447  | GUCUGCC       | 8mer-1a   | miR-346      | LNCaP, 22RV1             |
| chr8  | 101931155      | 101931216    | 3' UTR               | -      | YWHAZ    | Prot coding | 101931200  | 101931208 | GUCUGCC       | 8mer-1a   | miR-346      | DU145, PC3, 22RV1, LAPC4 |
| chr8  | 101964268      | 101964298    | 3' UTR               | -      | YWHAZ    | Prot coding | 101964283  | 101964290 | GUCUGCC       | 7mer-1a   | miR-346      | PC3                      |

**Table S7: MiR-346, -361-3p and -197-3p Target ARHGDI1, TAGLN2 and YWHAZ in Prostate Cancer Cells.** Binding sites for miR-346, -361-3p and -197-3p in promoter, coding region and 3'UTRs of ARHGDI1, TAGLN2 and YWHAZ, as identified by AGO-PAR-CLIP across five prostate cancer cell lines.
